# Supplementary material for: Anemia Acuity Effect on Transfusion Strategies in Acute Myocardial Infarction: A Secondary Analysis of the MINT Trial
Source: PubMed Central journal article supplement (PMC11530937; doi:10.1001/jamanetworkopen.2024.42361), 2024-11-01
Supplement: jamanetwopen-e2442361-s002.pdf [file jamanetwopen-e2442361-s002.pdf]

## Supplementary Online Content

Carrier FM, Cooper HA, Portela GT, et al. Anemia acuity effect on transfusion strategies in acute myocardial infarction: a secondary analysis of the MINT trial. *JAMA Netw Open*. 2024;7(11):e2442361. doi:10.1001/jamanetworkopen.2024.42361

**eTable 1.** Participants' Characteristics Included and Excluded From the Sub-Study

**eTable 2.** Distribution of RBC Transfusions From Randomization to Hospital Discharge

**eTable 3.** Association Between Acute Anemia and 30-Day Outcomes Using an Alternate Definition of Acute and Chronic Anemia

**eTable 4.** Relative Excess Risk Due to Interaction (RERI) for 30-Day Outcomes

**eTable 5.** Distribution, Association With, and Intervention Effect on 30-Day Transfusion-Related Pulmonary Complications

**eTable 6.** Association Between Acute Anemia and 30-Day Outcomes, Restricted to Participants Hospitalized for 3 Days or More at Time of Randomization

**eTable 7.** Association Between Acute Anemia and 30-Day Outcomes, Restricted to Participants

**eFigure 1.** Effect of a Restrictive Strategy, Compared to a Liberal Strategy, on 30-Day Outcomes Overall and Stratified by Anemia Acuity, Using an Alternate Definition of Acute and Chronic Anemia

**eFigure 2.** Effect of a Restrictive Strategy, Compared to a Liberal Strategy, on 30-Day Outcomes Overall and Stratified by Anemia Acuity, Restricted to Participants Hospitalized for 3 Days or More at Time of Randomization

**eFigure 3.** Effect of a Restrictive Strategy, Compared to a Liberal Strategy, on 30-Day Outcomes Overall and Stratified by Anemia Acuity, Restricted to Participants Who Did Not Receive RBCs Prior to Randomization

This supplementary material has been provided by the authors to give readers additional information about their work.

**eTable 1. Participants' characteristics included and excluded from the sub-study**

| Total MINT sample (n = 3,504)                                                       | Included<br>(n = 3,144) | Excluded<br>(n = 360) |
|-------------------------------------------------------------------------------------|-------------------------|-----------------------|
| <b>Demographics, No. (%)</b>                                                        |                         |                       |
| Age, mean (SD) <sup>a</sup>                                                         | 72.3 (11.6)             | 71.1 (11.7)           |
| Sex (male)                                                                          | 1,715 (54.5)            | 196 (54.4)            |
| Body mass index, mean (SD) <sup>a</sup>                                             | 28.6 (7.1)              | 28.1 (6.7)            |
| <b>Comorbidities, No. (%)</b>                                                       |                         |                       |
| Smoking Status <sup>a</sup>                                                         |                         |                       |
| Never                                                                               | 1,194 (40.2)            | 134 (40.1)            |
| Former                                                                              | 1,283 (43.2)            | 145 (43.4)            |
| Current                                                                             | 493 (16.9)              | 55 (16.5)             |
| History of MI                                                                       | 1,023 (32.5)            | 115 (31.9)            |
| Most recent ejection fraction, mean (SD) <sup>a</sup>                               | 47.4 (13.7)             | 47.5 (12.1)           |
| History of stroke                                                                   | 551 (17.5)              | 67 (18.6)             |
| History of atrial fibrillation                                                      | 807 (25.7)              | 93 (25.8)             |
| History of peripheral artery disease                                                | 639 (20.3)              | 81 (22.5)             |
| History of renal failure                                                            | 1,434 (45.6)            | 173 (48.1)            |
| History of diabetes mellitus                                                        | 1,690 (53.8)            | 206 (57.2)            |
| History of hypertension                                                             | 2,670 (84.9)            | 306 (85.0)            |
| History of hypercholesterolemia                                                     | 2,038 (64.8)            | 232 (64.4)            |
| History of chronic obstructive pulmonary disease or asthma                          | 747 (23.8)              | 93 (25.8)             |
| History of cancer                                                                   | 703 (22.4)              | 66 (18.3)             |
| <b>MI characteristics at randomization, No. (%)</b>                                 |                         |                       |
| MI type                                                                             |                         |                       |
| Type 1                                                                              | 1,307 (41.6)            | 153 (42.5)            |
| Type 2                                                                              | 1,756 (55.9)            | 199 (55.3)            |
| Other                                                                               | 81 (2.6)                | 8 (2.2)               |
| Performed angiogram <sup>a</sup>                                                    | 1,539 (49.0)            | 199 (55.3)            |
| Percutaneous intervention                                                           | 935 (29.7)              | 121 (33.6)            |
| Coronary artery bypass graft surgery                                                | 11 (0.3)                | 0 (0.0)               |
| Time from first symptoms to hospital admission (days), median (Q1, Q3) <sup>a</sup> | 0 (0, 1)                | 0 (0, 0)              |
| Time from hospital admission to randomization (days), median (Q1, Q3)               | 3 (1, 5)                | 4 (2, 8)              |
| <b>Anticoagulants at randomization<sup>a</sup>, No. (%)</b>                         |                         |                       |
| <b>Number of antiplatelets or anticoagulants</b>                                    |                         |                       |

|                                                                      |              |            |
|----------------------------------------------------------------------|--------------|------------|
| 0                                                                    | 215 (6.8)    | 15 (4.2)   |
| 1                                                                    | 482 (15.3)   | 42 (11.7)  |
| 2                                                                    | 933 (29.7)   | 110 (30.6) |
| 3+                                                                   | 1,513 (48.1) | 193 (53.6) |
| <b>Antiplatelets</b>                                                 |              |            |
| Aspirin                                                              | 2,586 (82.3) | 317 (88.1) |
| P2Y12 Inhibitor                                                      | 1,699 (54.1) | 224 (62.2) |
| Glycoprotein IIb/IIIa inhibitor                                      | 83 (2.6)     | 5 (1.4)    |
| <b>Anticoagulants</b>                                                |              |            |
| Unfractionated or low molecular weight heparin                       | 2,206 (70.2) | 268 (74.4) |
| Warfarin                                                             | 129 (4.1)    | 16 (4.4)   |
| Any other anticoagulant                                              | 317 (10.1)   | 34 (9.4)   |
| <b>Other characteristics prior to randomization, No. (%)</b>         |              |            |
| Any RBC transfusion                                                  | 1,117 (35.5) | 120 (33.3) |
| Number of RBC units transfused (units), median (Q1, Q3) <sup>a</sup> | 0 (0, 1)     | 0 (0, 1)   |
| Clinical bleed                                                       | 414 (13.2)   | 45 (12.5)  |
| Critical care at randomization <sup>b</sup>                          | 1,470 (46.8) | 209 (58.1) |
| Dialysis                                                             | 358 (11.4)   | 57 (15.8)  |
| Mechanical ventilation                                               | 426 (13.5)   | 55 (15.3)  |

<sup>a</sup> The following variables had missing values which were not included in the denominator of the percentages or the calculations of the means (SD): Age (n=1); Body Mass Index (n=139); Smoking Status (n=200); Most Recent Ejection Fraction (n=1246); Performed Angiogram (n=1); Days from Symptoms to Hospital Admission (n=473); Anticoagulants at randomization (n=1); Number of RBC units Transfused (n=12).

<sup>b</sup> Hospitalization in a critical care unit or a coronary care unit

MI = Myocardial Infarction, SD = Standard deviation, Q1= first quartile, Q3= third quartile

**eTable 2. Distribution of RBC transfusions from randomization to hospital discharge**

| <b>n=3,144</b>                                     | <b>Acute anemia (n=1,078)</b> |                            |                                | <b>Chronic anemia (n=2,066)</b> |                              |                                  |
|----------------------------------------------------|-------------------------------|----------------------------|--------------------------------|---------------------------------|------------------------------|----------------------------------|
| <b>Outcomes</b>                                    | <b>Total</b>                  | <b>Liberal<br/>(n=539)</b> | <b>Restrictive<br/>(n=539)</b> | <b>Total</b>                    | <b>Liberal<br/>(n=1,054)</b> | <b>Restrictive<br/>(n=1,012)</b> |
| Number of RBC units transfused,<br>median (Q1, Q3) | 1<br>(0,2)                    | 2 (1,3)                    | 0 (0,1)                        | 1<br>(0,2)                      | 2 (1,3)                      | 0 (0,1)                          |

Q1= first quartile, Q3= third quartile, RBC = Red Blood Cells

**eTable 3. Association between acute anemia and 30-day outcomes using an alternate definition of acute and chronic anemia<sup>a</sup>**

| <b>30-day outcomes</b>               | <b>Crude RR (95% CI)</b> | <b>Adjusted RR (95% CI)<sup>b</sup></b> |
|--------------------------------------|--------------------------|-----------------------------------------|
| Death or recurrent MI                | 0.90 (0.68, 1.18)        | 0.95 (0.72, 1.26)                       |
| Death                                | 1.16 (0.83, 1.62)        | 1.27 (0.89, 1.81)                       |
| Recurrent MI                         | 0.71 (0.46, 1.11)        | 0.73 (0.46, 1.15)                       |
| Cardiac death                        | 1.02 (0.60, 1.73)        | 0.95 (0.55, 1.64)                       |
| Heart failure                        | 0.76 (0.47, 1.23)        | 0.80 (0.49, 1.31)                       |
| Pulmonary complications <sup>c</sup> | 1.15 (0.87, 1.51)        | 1.31 (0.98, 1.75)                       |
| Major bleeding episode               | 1.15 (0.85, 1.55)        | 1.34 (0.98, 1.84)                       |

**Acute anemia (n=339) is compared to chronic anemia (n=2805).**

<sup>a</sup> Alternate definition: Acute Anemia group included participants with a WHO-defined normal Hgb at admission followed by a drop to <10 g/dL (to be eligible for the MINT trial). All others were placed in the Chronic Anemia group.

<sup>b</sup> The models were adjusted for randomized transfusion strategy, demographics (age, sex, smoking [never, ever, current, unknown], and anemia-related comorbidities (cancer, renal failure, diabetes), pre-randomization characteristics (baseline hemoglobin [g/dL], number of anticoagulants [warfarin, heparin, other] and antiplatelets [aspirin, P2Y12, glycoprotein], MI type [type 1, type 2, other]) with a random effect for site.

<sup>c</sup> Pulmonary complications = TRALI, TACO, pneumonia, or acute respiratory failure

RR = Risk ratio, CI = Confidence intervals, MI = Myocardial infarction, TACO = Transfusion associated circulatory overload, TRALI = Transfusion related acute lung injury.

**eTable 4. Relative excess risk due to interaction (RERI) for 30-day outcomes**

| <b>30-day outcomes</b>               | <b>RERI (95% CI<sup>a</sup>)</b> |
|--------------------------------------|----------------------------------|
| Death or recurrent MI                | -0.08 (-0.68 to 0.49)            |
| Death                                | 0.06 (-0.84 to 0.78)             |
| Recurrent MI                         | -0.11 (-1.02 to 0.56)            |
| Cardiac mortality                    | -0.01 (-1.68 to 1.22)            |
| Heart failure                        | -0.35 (-1.25 to 0.44)            |
| Pulmonary complications <sup>b</sup> | 0.18 (-0.32 to 0.69)             |
| Major bleeding episode               | -0.33 (-1.08 to 0.26)            |

A RERI = 0 means no interaction (no effect modification), a RERI below 0 means a negative interaction and a RERI above 1 means a positive interaction.

<sup>a</sup> Based on 95% clustered bootstrap CIs from 1000 resamples (model convergence occurred in >96% of iterations for all outcomes)

<sup>b</sup> Pulmonary complications = TRALI, TACO, pneumonia, or acute respiratory failure

**eTable 5. Distribution, association with, and intervention effect on 30-day transfusion-related pulmonary complications**

**A. Crude distribution of the outcome**

| n=3,144               | Acute anemia (n=1,078) |                 |                     | Chronic anemia (n=2,066) |                   |                       |
|-----------------------|------------------------|-----------------|---------------------|--------------------------|-------------------|-----------------------|
| Outcomes              | Total                  | Liberal (n=539) | Restrictive (n=539) | Total                    | Liberal (n=1,054) | Restrictive (n=1,012) |
| TACO & TRALI, No. (%) | 12 (1.11)              | 10 (1.86)       | 2 (0.37)            | 20 (0.97)                | 15 (1.42)         | 5 (0.49)              |

**B. Association between acute anemia, compared to chronic anemia, and the outcome**

| Outcomes     | Crude RR (95% CI) | Adjusted RR (95% CI)* |
|--------------|-------------------|-----------------------|
| TACO & TRALI | 1.10 (0.53-2.25)  | 1.16 (0.56-2.41)      |

**C. Effect of the restrictive RBC transfusion strategy compared to the liberal one on the outcome**

| Outcomes     | Total sample RR (95% CI) | Acute anemia RR (95% CI) | Chronic anemia RR (95% CI) | Interaction p value |
|--------------|--------------------------|--------------------------|----------------------------|---------------------|
| TACO & TRALI | 0.26 (0.12-0.61)         | 0.18 (0.04-0.83)         | 0.33 (0.12-0.89)           | 0.53                |

The model was adjusted for randomized transfusion strategy, demographics (age, sex, smoking [never, ever, current, unknown], and anemia-related comorbidities (cancer, renal failure, diabetes), pre-randomization characteristics (baseline hemoglobin [g/dL], number of anticoagulants [warfarin, heparin, other] and antiplatelets [aspirin, P2Y12, glycoprotein], MI type [type 1, type 2, other]) with a random effect for site.

The RERI for this outcome was -0.39 (95% CI -1.60 to 0.32)

TACO = Transfusion associated circulatory overload, TRALI = Transfusion related acute lung injury, RR = Risk Ratio, CI = Confidence Intervals.

**eTable 6. Association between acute anemia and 30-day outcomes, restricted to participants hospitalized for 3 days or more at time of randomization.**

| 30-day outcomes                      | Crude RR (95% CI) | Adjusted RR (95% CI) <sup>a</sup> |
|--------------------------------------|-------------------|-----------------------------------|
| Death or recurrent MI                | 1.22 (0.98-1.52)  | 1.24 (0.98-1.56)                  |
| Death                                | 1.59 (1.17-2.17)  | 1.60 (1.16-2.20)                  |
| Recurrent MI                         | 0.91 (0.66-1.28)  | 0.95 (0.67-1.34)                  |
| Cardiac mortality                    | 1.19 (0.76-1.86)  | 1.10 (0.69-1.75)                  |
| Heart failure                        | 0.82 (0.57-1.18)  | 0.85 (0.58-1.23)                  |
| Pulmonary complications <sup>b</sup> | 1.46 (1.12-1.89)  | 1.47 (1.12-1.93)                  |
| Major bleeding episode               | 1.19 (0.90-1.58)  | 1.14 (0.85-1.52)                  |

**Acute anemia (n=881) is compared to chronic anemia (n=806).**

RR greater than 1 favor chronic anemia.

<sup>a</sup> The models were adjusted for randomized transfusion strategy, demographics (age, sex, smoking [never, ever, current, unknown], and anemia-related comorbidities (cancer, renal failure, diabetes), pre-randomization characteristics (baseline hemoglobin [g/dL], number of anticoagulants [warfarin, heparin, other] and antiplatelets [aspirin, P2Y12, glycoprotein], MI type [type 1, type 2, other]) with a random effect for site.

<sup>b</sup> Pulmonary complications = TRALI, TACO, pneumonia, or acute respiratory failure

RR = Risk ratio, CI = Confidence intervals, MI = Myocardial infarction, TACO = Transfusion associated circulatory overload, TRALI = Transfusion related acute lung injury.



**eTable 7. Association between acute anemia and 30-day outcomes, restricted to participants who did not receive RBCs prior to randomization.**

| 30-day outcomes                      | Crude RR (95% CI) | Adjusted RR (95% CI) <sup>a</sup> |
|--------------------------------------|-------------------|-----------------------------------|
| Death or recurrent MI                | 1.17 (0.93-1.46)  | 1.15 (0.92-1.45)                  |
| Death                                | 1.51 (1.12-2.03)  | 1.52 (1.12-2.07)                  |
| Recurrent MI                         | 0.92 (0.65-1.31)  | 0.88 (0.61-1.26)                  |
| Cardiac mortality                    | 1.12 (0.71-1.75)  | 0.96 (0.61-1.52)                  |
| Heart failure                        | 0.90 (0.62-1.31)  | 0.95 (0.65-1.40)                  |
| Pulmonary complications <sup>b</sup> | 1.14 (0.89-1.47)  | 1.20 (0.92-1.55)                  |
| Major bleeding episode               | 0.97 (0.71-1.33)  | 0.96 (0.69-1.32)                  |

**Acute anemia (n=541) is compared to chronic anemia (n=1,486).**

<sup>a</sup> The models were adjusted for randomized transfusion strategy, demographics (age, sex, smoking [never, ever, current, unknown], and anemia-related comorbidities (cancer, renal failure, diabetes), pre-randomization characteristics (baseline hemoglobin [g/dL], number of anticoagulants [warfarin, heparin, other] and antiplatelets [aspirin, P2Y12, glycoprotein], MI type [type 1, type 2, other]) with a random effect for site.

<sup>b</sup> Pulmonary complications = TRALI, TACO, pneumonia, or acute respiratory failure

RR = Risk ratio, CI = Confidence intervals, MI = Myocardial infarction, TACO = Transfusion associated circulatory overload, TRALI = Transfusion related acute lung injury.

**eFigure 1. Effect of a restrictive strategy, compared to a liberal strategy, on 30-day outcomes overall and stratified by anemia acuity, using an alternate definition of acute and chronic anemia.**

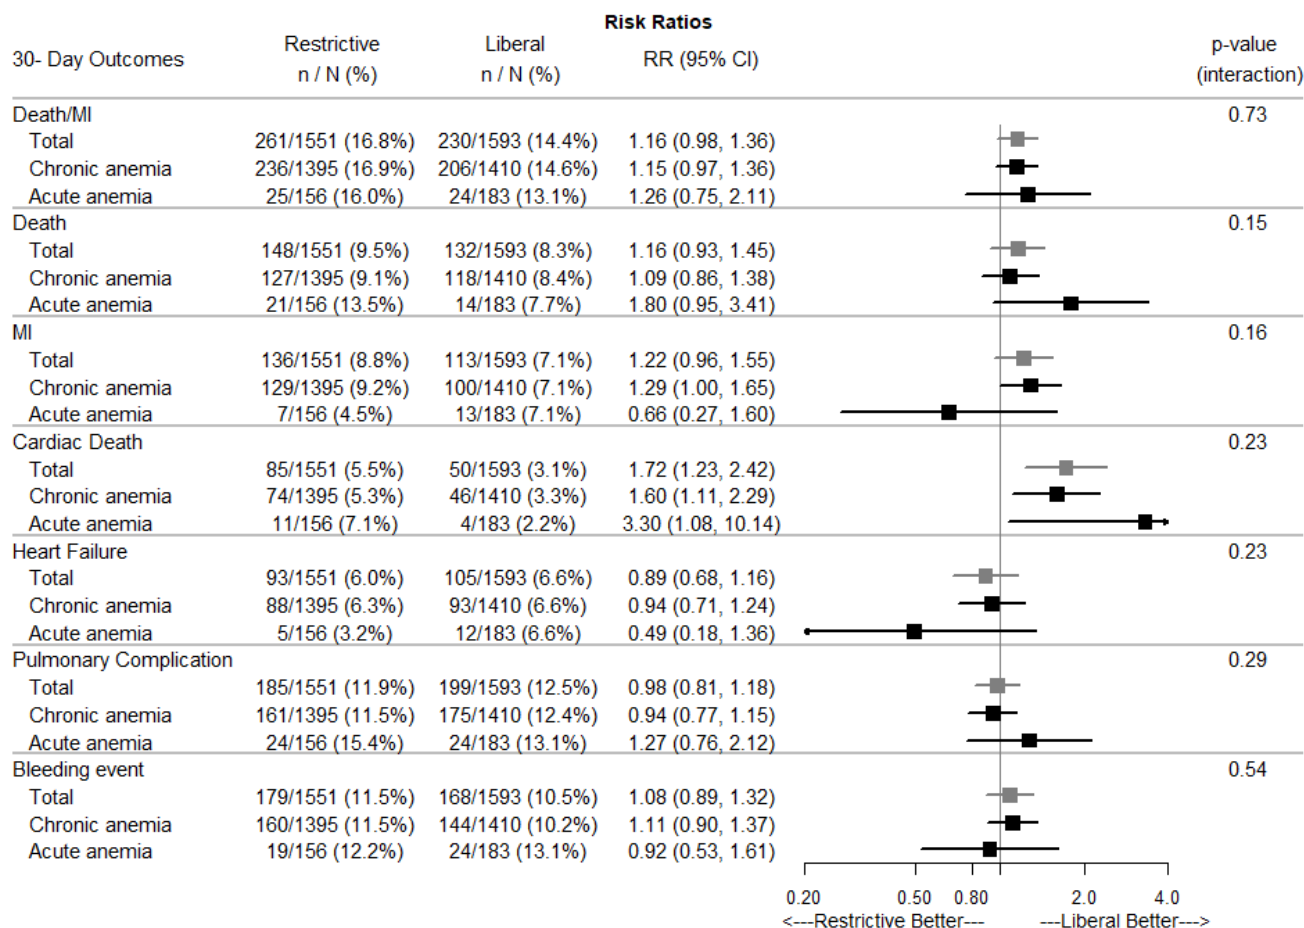

**Legend:**

n = 3,144

Pulmonary complications = TRALI, TACO, pneumonia, or acute respiratory failure

RR = Risk ratio, CI = Confidence intervals, MI = Myocardial infarction, TACO = Transfusion associated circulatory overload, TRALI = Transfusion related acute lung injury.

The models were adjusted for randomized transfusion strategy, demographics (age, sex, smoking [never, ever, current, unknown], and anemia-related comorbidities (cancer, renal failure, diabetes), pre-randomization characteristics (baseline hemoglobin [g/dL], number of anticoagulants [warfarin, heparin, other] and antiplatelets [aspirin, P2Y12, glycoprotein], MI type [type 1, type 2, other]) with a random effect for site.

**eFigure 2. Effect of a restrictive strategy, compared to a liberal strategy, on 30-day outcomes overall and stratified by anemia acuity, restricted to participants hospitalized for 3 days or more at time of randomization.**

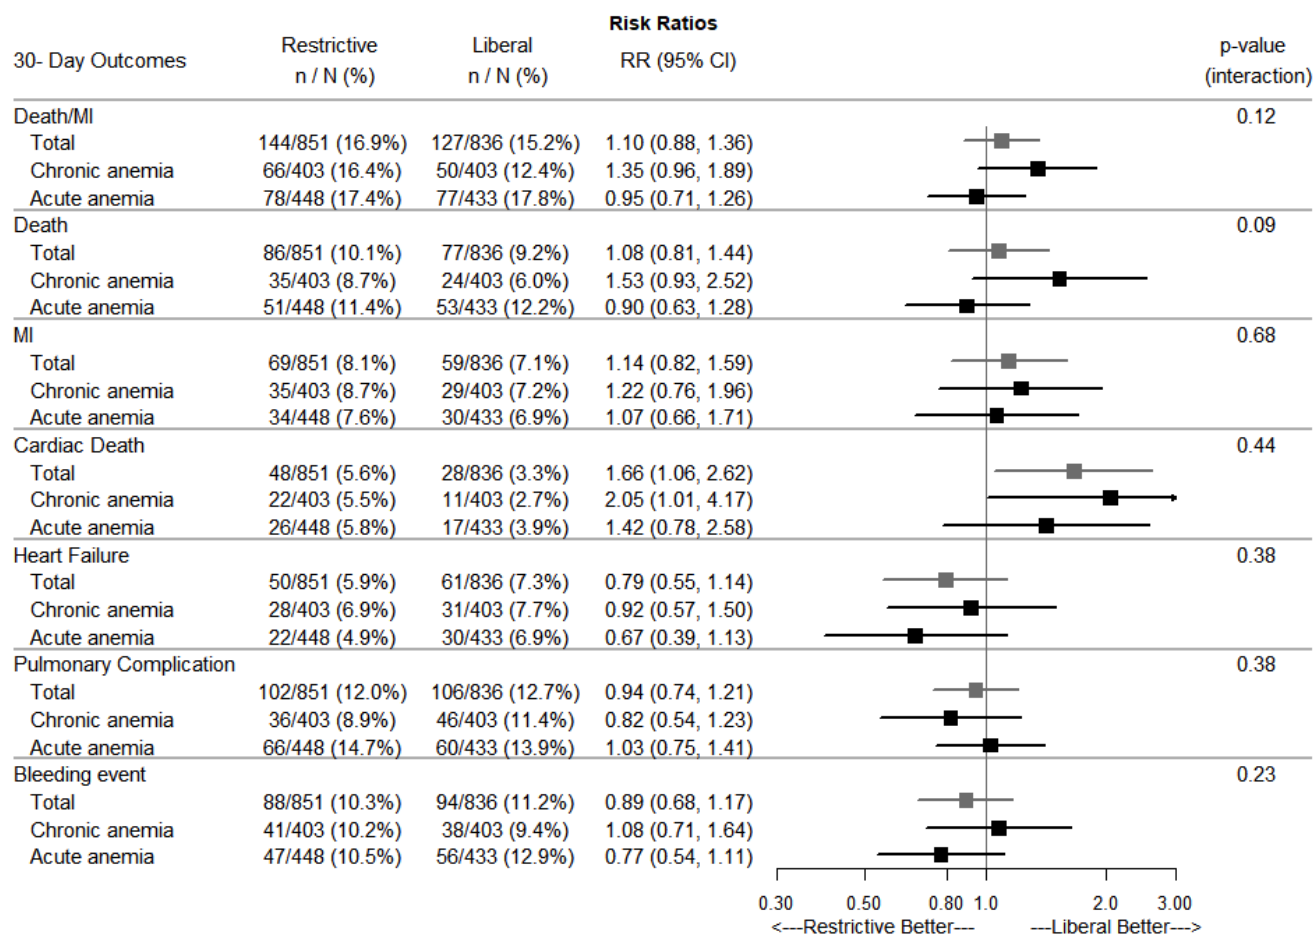

**Legend:**

n = 1,687

Pulmonary complications = TRALI, TACO, pneumonia, or acute respiratory failure

RR = Risk ratio, CI = Confidence intervals, MI = Myocardial infarction, TACO = Transfusion associated circulatory overload, TRALI = Transfusion related acute lung injury.

The models were adjusted for randomized transfusion strategy, demographics (age, sex, smoking [never, ever, current, unknown], and anemia-related comorbidities (cancer, renal failure, diabetes), pre-randomization characteristics (baseline hemoglobin [g/dL], number of anticoagulants [warfarin, heparin, other] and antiplatelets [aspirin, P2Y12, glycoprotein], MI type [type 1, type 2, other]) with a random effect for site.

**eFigure 3. Effect of a restrictive strategy, compared to a liberal strategy, on 30-day outcomes overall and stratified by anemia acuity, restricted to participants who did not receive RBCs prior to randomization**

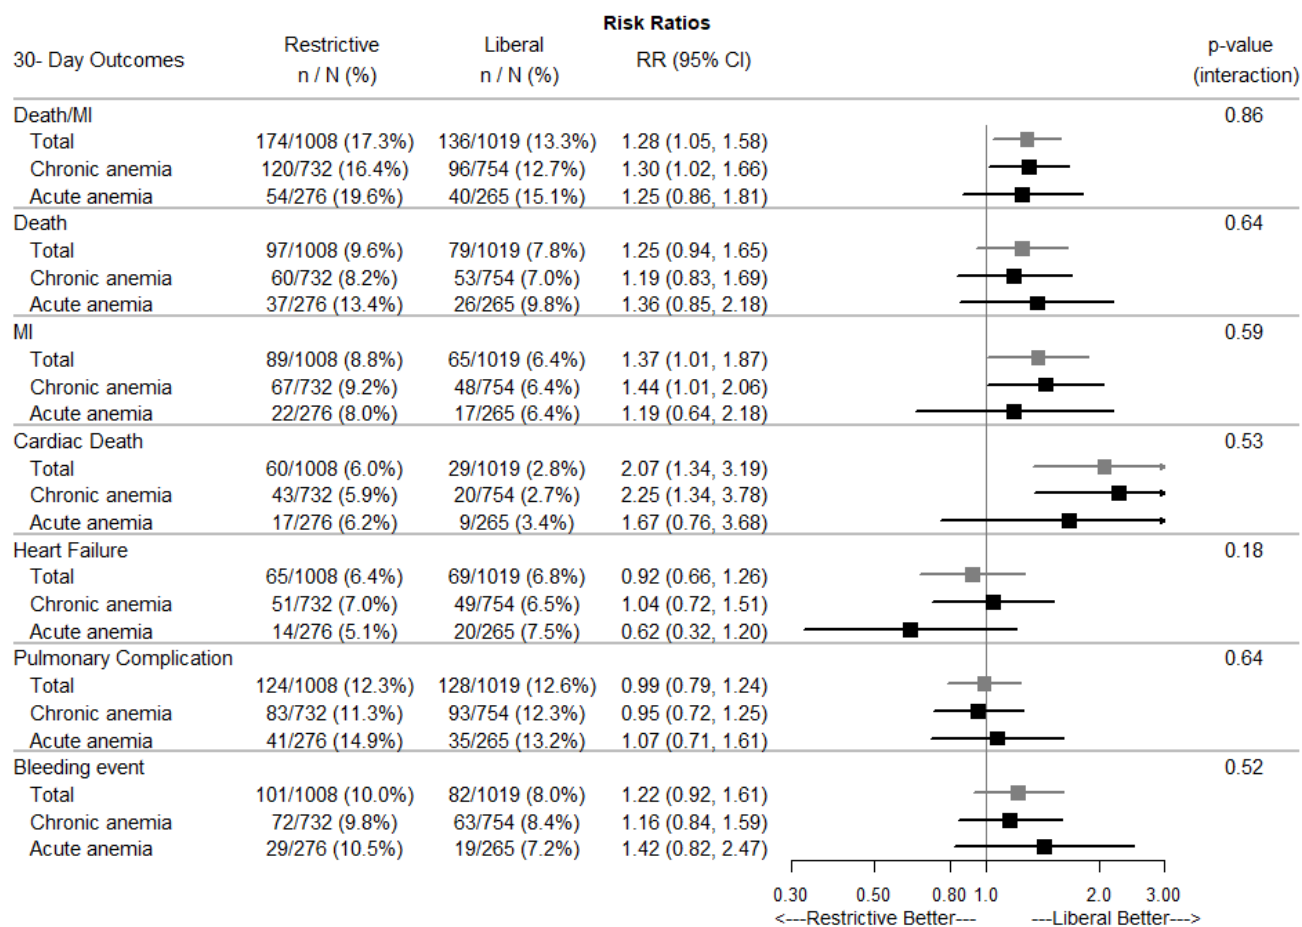

**Legend:**

n = 2,027

Pulmonary complications = TRALI, TACO, pneumonia, or acute respiratory failure

RR = Risk ratio, CI = Confidence intervals, MI = Myocardial infarction, TACO = Transfusion associated circulatory overload, TRALI = Transfusion related acute lung injury.

The models were adjusted for randomized transfusion strategy, demographics (age, sex, smoking [never, ever, current, unknown], and anemia-related comorbidities (cancer, renal failure, diabetes), pre-randomization characteristics (baseline hemoglobin [g/dL], number of anticoagulants [warfarin, heparin, other] and antiplatelets [aspirin, P2Y12, glycoprotein], MI type [type 1, type 2, other]) with a random effect for site.
