# Supplementary material for: Anemia Acuity Effect on Transfusion Strategies in Acute Myocardial Infarction: A Secondary Analysis of the MINT Trial
Source: PubMed Central journal article supplement (PMC11530937; doi:10.1001/jamanetworkopen.2024.42361), 2024-11-01
Supplement: jamanetwopen-e2442361-s003.pdf [file jamanetwopen-e2442361-s003.pdf]

\*Indicates required information. Only first name, last name, and suffix will appear in PubMed.

| <b>*Group Name(s): MINT Investigators</b> |                   |                              |                  |                                                                           |                                          |                                                         |                                                                                                   |
|-------------------------------------------|-------------------|------------------------------|------------------|---------------------------------------------------------------------------|------------------------------------------|---------------------------------------------------------|---------------------------------------------------------------------------------------------------|
| <b>*First Name and Middle Initial(s)</b>  | <b>*Last Name</b> | <b>*Suffix (eg, Jr, III)</b> | Academic Degrees | Institution                                                               | Location (city, state/province, country) | Role or Contribution, eg, chair, principal investigator | Group (if more than 1 Group listed in the byline) and/or Subgroup (eg, Steering Committee)        |
| Jeffrey L.                                | Carson            |                              |                  | Rutgers Robert Wood Johnson Medical School                                | United States                            | Principal Investigator                                  | Study Chair, Executive Committee, Steering Committee, Clinical Coordinating Center, Clinical Site |
| Fei                                       | Chen              |                              |                  | Rutgers Robert Wood Johnson Medical School                                | United States                            | Researcher                                              |                                                                                                   |
| Patrick                                   | Desanto           |                              |                  | Rutgers Robert Wood Johnson Medical School                                | United States                            | Coordinator                                             |                                                                                                   |
| Karen                                     | Dragert           |                              |                  | Rutgers Robert Wood Johnson Medical School                                | United States                            | Coordinator                                             | Clinical Site and Clinical Coordinating Center                                                    |
| William J.                                | Kostis            |                              |                  | Rutgers Robert Wood Johnson Medical School                                | United States                            | Co-Investigator                                         | Steering Committee and Clinical Site                                                              |
| Sarang                                    | Kim               |                              |                  | Rutgers Robert Wood Johnson Medical School                                | United States                            | Medical Safety Officer                                  | Clinical Coordinating Center                                                                      |
| Deborah                                   | McCloskey         |                              |                  | Rutgers Robert Wood Johnson Medical School                                | United States                            | Research Staff                                          |                                                                                                   |
| Helaine                                   | Noveck            |                              |                  | Rutgers Robert Wood Johnson Medical School                                | United States                            | Coordinator                                             | Clinical Coordinating Center, Clinical Site, Steering Committee                                   |
| Sheila                                    | Redding           |                              |                  | Rutgers Robert Wood Johnson Medical School                                | United States                            | Coordinator                                             |                                                                                                   |
| Ami                                       | Patel             |                              |                  | Rutgers Robert Wood Johnson Medical School                                | United States                            | Coordinator                                             | Clinical Coordinating Center and Clinical Site                                                    |
| Shahab                                    | Ghafghazi         |                              |                  | Louisville - University of Louisville , Jewish Hospital , Norton Hospital | United States                            | Principal Investigator                                  |                                                                                                   |

Supplemental Online Content: Nonauthor Collaborators

\*Indicates required information. Only first name, last name, and suffix will appear in PubMed.

| *First Name and Middle Initial(s) | *Last Name  | *Suffix (eg, Jr, III) | Academic Degrees | Institution                                                                  | Location (city, state/province, country) | Role or Contribution, eg, chair, principal investigator | Group (if more than 1 Group listed in the byline) and/or Subgroup (eg, Steering Committee) |
|-----------------------------------|-------------|-----------------------|------------------|------------------------------------------------------------------------------|------------------------------------------|---------------------------------------------------------|--------------------------------------------------------------------------------------------|
| Sharon                            | Vincent     |                       |                  | Louisville - University of Louisville ,<br>Jewish Hospital , Norton Hospital | United States                            | Coordinator                                             |                                                                                            |
| Hardeep                           | Dholiya     |                       |                  | Louisville - University of Louisville ,<br>Jewish Hospital , Norton Hospital | United States                            | Coordinator                                             |                                                                                            |
| Dinesh                            | Kalra       |                       |                  | Louisville - University of Louisville ,<br>Jewish Hospital , Norton Hospital | United States                            | Co-Investigator                                         |                                                                                            |
| Jennifer                          | Moore       |                       |                  | Louisville - University of Louisville ,<br>Jewish Hospital , Norton Hospital | United States                            | Coordinator                                             |                                                                                            |
| Mallory                           | Hatfield    |                       |                  | Louisville - University of Louisville ,<br>Jewish Hospital , Norton Hospital | United States                            | Coordinator                                             |                                                                                            |
| Howard A.                         | Cooper      |                       |                  | Westchester Medical Center                                                   | United States                            | Principal Investigator                                  | Clinical Site, Steering Committee                                                          |
| Syed                              | Haidry      |                       |                  | Westchester Medical Center                                                   | United States                            | Researcher                                              |                                                                                            |
| Ahmed                             | Hassanin    |                       |                  | Westchester Medical Center                                                   | United States                            | Researcher                                              |                                                                                            |
| Risheek                           | Kaul        |                       |                  | Westchester Medical Center                                                   | United States                            | Research Staff                                          |                                                                                            |
| Fnu                               | Namrata     |                       |                  | Westchester Medical Center                                                   | United States                            | Coordinator                                             |                                                                                            |
| Parija                            | Sharedalal  |                       |                  | Westchester Medical Center                                                   | United States                            | Researcher                                              |                                                                                            |
| Jayakumar                         | Sreenivasan |                       |                  | Westchester Medical Center                                                   | United States                            | Researcher                                              |                                                                                            |
| Jasjit                            | Bhinder     |                       |                  | Westchester Medical Center                                                   | United States                            | Researcher                                              |                                                                                            |
| Mohammed                          | Hasan Khan  |                       |                  | Westchester Medical Center                                                   | United States                            | Researcher                                              |                                                                                            |
| Anna                              | Koulova     |                       |                  | Westchester Medical Center                                                   | United States                            | Researcher                                              |                                                                                            |
| Behram                            | Mody        |                       |                  | Westchester Medical Center                                                   | United States                            | Researcher                                              |                                                                                            |
| Yogita                            | Rochlani    |                       |                  | Westchester Medical Center                                                   | United States                            | Researcher                                              |                                                                                            |
| Anuritha                          | Tirumani    |                       |                  | Westchester Medical Center                                                   | United States                            | Coordinator                                             |                                                                                            |
| Frances                           | Wood        |                       |                  | WakeMed Health & Hospitals                                                   | United States                            | Principal Investigator                                  |                                                                                            |

Supplemental Online Content: Nonauthor Collaborators

\*Indicates required information. Only first name, last name, and suffix will appear in PubMed.

| *First Name and Middle Initial(s) | *Last Name | *Suffix (eg, Jr, III) | Academic Degrees | Institution                                                               | Location (city, state/province, country) | Role or Contribution, eg, chair, principal investigator | Group (if more than 1 Group listed in the byline) and/or Subgroup (eg, Steering Committee) |
|-----------------------------------|------------|-----------------------|------------------|---------------------------------------------------------------------------|------------------------------------------|---------------------------------------------------------|--------------------------------------------------------------------------------------------|
| Rhonda                            | Norton     |                       |                  | WakeMed Health & Hospitals                                                | United States                            | Coordinator                                             |                                                                                            |
| LaMonica                          | Daniel     |                       |                  | WakeMed Health & Hospitals                                                | United States                            | Coordinator                                             |                                                                                            |
| Mark                              | Menegus    |                       |                  | Montefiore - Weiler Hospital ,<br>Moses Hospital                          | United States                            | Principal Investigator                                  |                                                                                            |
| Samanta                           | Baboolall  |                       |                  | Montefiore - Weiler Hospital ,<br>Moses Hospital                          | United States                            | Coordinator                                             |                                                                                            |
| Sheila                            | Davila     |                       |                  | Montefiore - Weiler Hospital ,<br>Moses Hospital                          | United States                            | Research Staff                                          |                                                                                            |
| Noelle                            | Manning    |                       |                  | Montefiore - Weiler Hospital ,<br>Moses Hospital                          | United States                            | Researcher                                              |                                                                                            |
| Mollie                            | Machado    |                       |                  | Montefiore - Weiler Hospital ,<br>Moses Hospital                          | United States                            | Coordinator                                             |                                                                                            |
| Judah                             | Rauch      |                       |                  | Montefiore - Weiler Hospital ,<br>Moses Hospital                          | United States                            | Researcher                                              |                                                                                            |
| Angeline                          | Camilo     |                       |                  | Montefiore - Weiler Hospital ,<br>Moses Hospital                          | United States                            | Coordinator                                             |                                                                                            |
| Estefania                         | Hernandez  |                       |                  | Montefiore - Weiler Hospital ,<br>Moses Hospital                          | United States                            | Coordinator                                             |                                                                                            |
| Muhammad                          | Iqbal      |                       |                  | Montefiore - Weiler Hospital ,<br>Moses Hospital                          | United States                            | Coordinator                                             |                                                                                            |
| Ervin                             | Mazniku    |                       |                  | Montefiore - Weiler Hospital ,<br>Moses Hospital                          | United States                            | Coordinator                                             |                                                                                            |
| Odilis                            | Ramirez    |                       |                  | Montefiore - Weiler Hospital ,<br>Moses Hospital                          | United States                            | Coordinator                                             |                                                                                            |
| Veronica                          | Day        |                       |                  | Montefiore - Weiler Hospital ,<br>Moses Hospital                          | United States                            | Coordinator                                             |                                                                                            |
| Barry                             | Uretsky    |                       |                  | University of Arkansas Medical<br>Sciences - Central Arkansas<br>Veterans | United States                            | Principal Investigator                                  |                                                                                            |

Supplemental Online Content: Nonauthor Collaborators

\*Indicates required information. Only first name, last name, and suffix will appear in PubMed.

| *First Name and Middle Initial(s) | *Last Name   | *Suffix (eg, Jr, III) | Academic Degrees | Institution                                                                                            | Location (city, state/province, country) | Role or Contribution, eg, chair, principal investigator | Group (if more than 1 Group listed in the byline) and/or Subgroup (eg, Steering Committee) |
|-----------------------------------|--------------|-----------------------|------------------|--------------------------------------------------------------------------------------------------------|------------------------------------------|---------------------------------------------------------|--------------------------------------------------------------------------------------------|
| Jesse                             | Byrd         |                       |                  | University of Arkansas Medical Sciences - Central Arkansas Veterans and University of Arkansas Medical | United States                            | Coordinator                                             |                                                                                            |
| Kristin                           | Miller       |                       |                  | University of Arkansas Medical Sciences - Central Arkansas Veterans and University of Arkansas Medical | United States                            | Coordinator                                             |                                                                                            |
| Srikanth                          | Vallurupalli |                       |                  | University of Arkansas Medical Sciences - University of Arkansas Medical                               | United States                            | Principal Investigator                                  |                                                                                            |
| Gregory                           | Maniatis     |                       |                  | Northwell Hospital System - Staten Island University                                                   | United States                            | Principal Investigator                                  |                                                                                            |
| Richard                           | Dima         |                       |                  | Northwell Hospital System - Staten Island University                                                   | United States                            | Coordinator                                             |                                                                                            |
| Roman                             | Royzman      |                       |                  | Northwell Hospital System - Staten Island University                                                   | United States                            | Researcher                                              |                                                                                            |
| Sean                              | Taylor       |                       |                  | Northwell Hospital System - Staten Island University                                                   | United States                            | Coordinator                                             |                                                                                            |
| Amanda                            | Tice         |                       |                  | Northwell Hospital System - Staten Island University                                                   | United States                            | Researcher                                              |                                                                                            |
| Brandon                           | Dilluvio     |                       |                  | Northwell Hospital System - Staten Island University                                                   | United States                            | Coordinator                                             |                                                                                            |
| Luis                              | Gruberg      |                       |                  | Northwell Hospital System - Southside Hospital                                                         | United States                            | Principal Investigator                                  |                                                                                            |
| Puneet                            | Gandotra     |                       |                  | Northwell Hospital System - Southside Hospital                                                         | United States                            | Researcher                                              |                                                                                            |
| Rachel                            | Gentles      |                       |                  | Northwell Hospital System - Southside Hospital                                                         | United States                            | Coordinator                                             |                                                                                            |
| Barbara                           | Shannon      |                       |                  | Northwell Hospital System - Southside Hospital                                                         | United States                            | Coordinator                                             |                                                                                            |

Supplemental Online Content: Nonauthor Collaborators

\*Indicates required information. Only first name, last name, and suffix will appear in PubMed.

| *First Name and Middle Initial(s) | *Last Name | *Suffix (eg, Jr, III) | Academic Degrees | Institution                                                 | Location (city, state/province, country) | Role or Contribution, eg, chair, principal investigator | Group (if more than 1 Group listed in the byline) and/or Subgroup (eg, Steering Committee) |
|-----------------------------------|------------|-----------------------|------------------|-------------------------------------------------------------|------------------------------------------|---------------------------------------------------------|--------------------------------------------------------------------------------------------|
| Maria                             | Masih      |                       |                  | Northwell Hospital System - Southside Hospital              | United States                            | Coordinator                                             |                                                                                            |
| Robert                            | Roswell    |                       |                  | Northwell Hospital System - Lenox Hill Hospital             | United States                            | Principal Investigator                                  |                                                                                            |
| Alana                             | Gulliver   |                       |                  | Northwell Hospital System - Lenox Hill Hospital             | United States                            | Researcher                                              |                                                                                            |
| Meriton                           | Ruhani     |                       |                  | Northwell Hospital System - Lenox Hill Hospital             | United States                            | Coordinator                                             |                                                                                            |
| Emily                             | Strober    |                       |                  | Northwell Hospital System - Lenox Hill Hospital             | United States                            | Coordinator                                             |                                                                                            |
| Samia                             | Tamazi     |                       |                  | Northwell Hospital System - Lenox Hill Hospital             | United States                            | Coordinator                                             |                                                                                            |
| Adam                              | Gershon    |                       |                  | Northwell Hospital System - Lenox Hill Hospital             | United States                            | Researcher                                              |                                                                                            |
| Kristie                           | Coleman    |                       |                  | Northwell Hospital System - Lenox Hill Hospital             | United States                            | Coordinator                                             |                                                                                            |
| Bernard                           | Kadosh     |                       |                  | Northwell Hospital System - Lenox Hill Hospital             | United States                            | Researcher                                              |                                                                                            |
| Rajiv                             | Jauhar     |                       |                  | Northwell Hospital System - North Shore University Hospital | United States                            | Principal Investigator                                  |                                                                                            |
| Harsha                            | Adnani     |                       |                  | Northwell Hospital System - North Shore University Hospital | United States                            | Researcher                                              |                                                                                            |
| Kyle                              | Agostini   |                       |                  | Northwell Hospital System - North Shore University Hospital | United States                            | Coordinator                                             |                                                                                            |
| Loukas                            | Boutis     |                       |                  | Northwell Hospital System - North Shore University Hospital | United States                            | Researcher                                              |                                                                                            |
| Ian                               | Dalangin   |                       |                  | Northwell Hospital System - North Shore University Hospital | United States                            | Researcher                                              |                                                                                            |
| Barry                             | Kaplan     |                       |                  | Northwell Hospital System - North Shore University Hospital | United States                            | Researcher                                              |                                                                                            |

Supplemental Online Content: Nonauthor Collaborators

\*Indicates required information. Only first name, last name, and suffix will appear in PubMed.

| *First Name and Middle Initial(s) | *Last Name  | *Suffix (eg, Jr, III) | Academic Degrees | Institution                                                 | Location (city, state/province, country) | Role or Contribution, eg, chair, principal investigator | Group (if more than 1 Group listed in the byline) and/or Subgroup (eg, Steering Committee) |
|-----------------------------------|-------------|-----------------------|------------------|-------------------------------------------------------------|------------------------------------------|---------------------------------------------------------|--------------------------------------------------------------------------------------------|
| Jae S.                            | Lee         |                       |                  | Northwell Hospital System - North Shore University Hospital | United States                            | Coordinator                                             |                                                                                            |
| Perwaiz                           | Meraj       |                       |                  | Northwell Hospital System - North Shore University Hospital | United States                            | Researcher                                              |                                                                                            |
| Riona                             | Timmons     |                       |                  | Northwell Hospital System - North Shore University Hospital | United States                            | Researcher                                              |                                                                                            |
| Carl                              | Reimers     |                       |                  | Northwell Hospital System - Northern Westchester Hospital   | United States                            | Principal Investigator                                  |                                                                                            |
| Craig                             | Basman      |                       |                  | Northwell Hospital System - Northern Westchester Hospital   | United States                            | Co-Investigator                                         |                                                                                            |
| Umar                              | Rashid      |                       |                  | Northwell Hospital System - Northern Westchester Hospital   | United States                            | Co-Investigator                                         |                                                                                            |
| Aglae                             | Garvey Rene |                       |                  | Northwell Hospital System - Northern Westchester Hospital   | United States                            | Researcher                                              |                                                                                            |
| Asha                              | Mellor      |                       |                  | Northwell Hospital System - Northern Westchester Hospital   | United States                            | Coordinator                                             |                                                                                            |
| Karen                             | duBourg     |                       |                  | Northwell Hospital System - Northern Westchester Hospital   | United States                            | Coordinator                                             |                                                                                            |
| Joseph                            | Rossi       |                       |                  | UNC Hospitals                                               | United States                            | Principal Investigator                                  |                                                                                            |
| Ryan                              | Orgel       |                       |                  | UNC Hospitals                                               | United States                            | Researcher                                              |                                                                                            |
| Emma                              | Reynolds    |                       |                  | UNC Hospitals                                               | United States                            | Coordinator                                             |                                                                                            |
| Tatum                             | Scholl      |                       |                  | UNC Hospitals                                               | United States                            | Researcher                                              |                                                                                            |
| Janet                             | Bogan       |                       |                  | UNC Hospitals                                               | United States                            | Coordinator                                             |                                                                                            |
| Olivia                            | Bogdan      |                       |                  | UNC Hospitals                                               | United States                            | Coordinator                                             |                                                                                            |
| Matt                              | Cavender    |                       |                  | UNC Hospitals                                               | United States                            | Co-Investigator                                         |                                                                                            |
| Gaetana                           | Cosentino   |                       |                  | UNC Hospitals                                               | United States                            | Researcher                                              |                                                                                            |
| Gabriela                          | De Jesus    |                       |                  | UNC Hospitals                                               | United States                            | Researcher                                              |                                                                                            |
| Megan                             | Gonzalez    |                       |                  | UNC Hospitals                                               | United States                            | Researcher                                              |                                                                                            |
| Julia                             | Hoang       |                       |                  | UNC Hospitals                                               | United States                            | Researcher                                              |                                                                                            |
| Emma                              | Kleemann    |                       |                  | UNC Hospitals                                               | United States                            | Researcher                                              |                                                                                            |

Supplemental Online Content: Nonauthor Collaborators

\*Indicates required information. Only first name, last name, and suffix will appear in PubMed.

| *First Name and Middle Initial(s) | *Last Name  | *Suffix (eg, Jr, III) | Academic Degrees | Institution                                                                                                | Location (city, state/province, country) | Role or Contribution, eg, chair, principal investigator | Group (if more than 1 Group listed in the byline) and/or Subgroup (eg, Steering Committee) |
|-----------------------------------|-------------|-----------------------|------------------|------------------------------------------------------------------------------------------------------------|------------------------------------------|---------------------------------------------------------|--------------------------------------------------------------------------------------------|
| Deanna                            | Ravenscraft |                       |                  | UNC Hospitals                                                                                              | United States                            | Coordinator                                             |                                                                                            |
| Teresa                            | Reed        |                       |                  | UNC Hospitals                                                                                              | United States                            | Researcher                                              |                                                                                            |
| Joshua                            | Roark       |                       |                  | UNC Hospitals                                                                                              | United States                            | Researcher                                              |                                                                                            |
| Samantha                          | Smith       |                       |                  | UNC Hospitals                                                                                              | United States                            | Researcher                                              |                                                                                            |
| Kaitlyn                           | Sternat     |                       |                  | UNC Hospitals                                                                                              | United States                            | Coordinator                                             |                                                                                            |
| Oreyane                           | Tate        |                       |                  | UNC Hospitals                                                                                              | United States                            | Researcher                                              |                                                                                            |
| Tyrone                            | Wade        |                       |                  | UNC Hospitals                                                                                              | United States                            | Coordinator                                             |                                                                                            |
| Hope                              | Wolf        |                       |                  | UNC Hospitals                                                                                              | United States                            | Coordinator                                             |                                                                                            |
| Farhad                            | Abtahian    |                       |                  | Rochester General Hospital                                                                                 | United States                            | Principal Investigator                                  |                                                                                            |
| Megan                             | Littleton   |                       |                  | Rochester General Hospital                                                                                 | United States                            | Researcher                                              |                                                                                            |
| Kayla                             | Malchoff    |                       |                  | Rochester General Hospital                                                                                 | United States                            | Researcher                                              |                                                                                            |
| Kelly                             | Mohr        |                       |                  | Rochester General Hospital                                                                                 | United States                            | Research Staff                                          |                                                                                            |
| Emily                             | Pierce      |                       |                  | Rochester General Hospital                                                                                 | United States                            | Researcher                                              |                                                                                            |
| Jennifer                          | LaLonde     |                       |                  | Rochester General Hospital                                                                                 | United States                            | Researcher                                              |                                                                                            |
| Kellie                            | Sherron     |                       |                  | Rochester General Hospital                                                                                 | United States                            | Research Staff                                          |                                                                                            |
| Tia                               | Albro       |                       |                  | Rochester General Hospital                                                                                 | United States                            | Co-Investigator                                         |                                                                                            |
| Patty                             | Noll        |                       |                  | Rochester General Hospital                                                                                 | United States                            | Coordinator                                             |                                                                                            |
| Meechai                           | Tessalee    |                       |                  | AdventHealth - Adventist Hinsdale Hospital , Adventist La Grange Hospital , Adventist Bolingbrook Hospital | United States                            | Principal Investigator                                  |                                                                                            |
| Claudia                           | Eaton       |                       |                  | AdventHealth - Adventist Hinsdale Hospital , Adventist La Grange Hospital , Adventist Bolingbrook Hospital | United States                            | Coordinator                                             |                                                                                            |
| Gregory                           | Barsness    |                       |                  | Mayo Clinic                                                                                                | United States                            | Principal Investigator                                  |                                                                                            |
| Diana                             | Albers      |                       |                  | Mayo Clinic                                                                                                | United States                            | Researcher                                              |                                                                                            |
| Jacob                             | Jentzer     |                       |                  | Mayo Clinic                                                                                                | United States                            | Researcher                                              |                                                                                            |

Supplemental Online Content: Nonauthor Collaborators

\*Indicates required information. Only first name, last name, and suffix will appear in PubMed.

| *First Name and Middle Initial(s) | *Last Name  | *Suffix (eg, Jr, III) | Academic Degrees | Institution                      | Location (city, state/province, country) | Role or Contribution, eg, chair, principal investigator | Group (if more than 1 Group listed in the byline) and/or Subgroup (eg, Steering Committee) |
|-----------------------------------|-------------|-----------------------|------------------|----------------------------------|------------------------------------------|---------------------------------------------------------|--------------------------------------------------------------------------------------------|
| J. Dawn                           | Abbott      |                       |                  | Lifespan - Rhode Island Hospital | United States                            | Principal Investigator                                  | Clinical Site and Steering Committee                                                       |
| Kelly                             | Franchetti  |                       |                  | Lifespan - Rhode Island Hospital | United States                            | Coordinator                                             |                                                                                            |
| Catherine                         | Gordon      |                       |                  | Lifespan - Rhode Island Hospital | United States                            | Research Staff                                          |                                                                                            |
| Herbert                           | Aronow      |                       |                  | Lifespan - The Miriam Hospital   | United States                            | Principal Investigator                                  |                                                                                            |
| Ellen                             | Cerullo     |                       |                  | Lifespan - The Miriam Hospital   | United States                            | Coordinator                                             |                                                                                            |
| Lori-Ann                          | Desimone    |                       |                  | Lifespan - The Miriam Hospital   | United States                            | Coordinator                                             |                                                                                            |
| Elizabeth                         | Nowak       |                       |                  | Lifespan - The Miriam Hospital   | United States                            | Coordinator                                             |                                                                                            |
| Elizabeth                         | Coccio      |                       |                  | Lifespan - The Miriam Hospital   | United States                            | Coordinator                                             |                                                                                            |
| Kodangudi                         | Ramanathan  |                       |                  | Memphis VA Medical Center        | United States                            | Principal Investigator                                  |                                                                                            |
| Adedayo                           | Adeboye     |                       |                  | Memphis VA Medical Center        | United States                            | Researcher                                              |                                                                                            |
| Ashley                            | Armstrong   |                       |                  | Memphis VA Medical Center        | United States                            | Coordinator                                             |                                                                                            |
| Lillie                            | Johnson     |                       |                  | Memphis VA Medical Center        | United States                            | Coordinator                                             |                                                                                            |
| Anh-Phuong                        | Pham        |                       |                  | Memphis VA Medical Center        | United States                            | Researcher                                              |                                                                                            |
| Rahman                            | Shah        |                       |                  | Memphis VA Medical Center        | United States                            | Co-Investigator                                         |                                                                                            |
| Mark                              | Schmidhofer |                       |                  | UPMC Presbyterian                | United States                            | Principal Investigator                                  |                                                                                            |
| Mary Jo                           | Albright    |                       |                  | UPMC Presbyterian                | United States                            | Coordinator                                             |                                                                                            |
| Melissa                           | Enlow       |                       |                  | UPMC Presbyterian                | United States                            | Coordinator                                             |                                                                                            |
| Barinder                          | Hansra      |                       |                  | UPMC Presbyterian                | United States                            | Researcher                                              |                                                                                            |
| Tracy                             | Nicholson   |                       |                  | UPMC Presbyterian                | United States                            | Coordinator                                             |                                                                                            |
| Catalin                           | Toma        |                       |                  | UPMC Presbyterian                | United States                            | Co-Investigator                                         |                                                                                            |
| Darrell                           | Triulzi     |                       |                  | UPMC Presbyterian                | United States                            | Co-Investigator                                         |                                                                                            |
| Megan                             | Basch       |                       |                  | UPMC Presbyterian                | United States                            | Coordinator                                             |                                                                                            |
| Gretchen                          | Bernardini  |                       |                  | UPMC Presbyterian                | United States                            | Coordinator                                             |                                                                                            |
| Amanda                            | Bollino     |                       |                  | UPMC Presbyterian                | United States                            | Coordinator                                             |                                                                                            |
| Laurie                            | Dennis      |                       |                  | UPMC Presbyterian                | United States                            | Coordinator                                             |                                                                                            |



## Supplemental Online Content: Nonauthor Collaborators

\*Indicates required information. Only first name, last name, and suffix will appear in PubMed.

| *First Name and Middle Initial(s) | *Last Name  | *Suffix (eg, Jr, III) | Academic Degrees | Institution                     | Location (city, state/province, country) | Role or Contribution, eg, chair, principal investigator | Group (if more than 1 Group listed in the byline) and/or Subgroup (eg, Steering Committee) |
|-----------------------------------|-------------|-----------------------|------------------|---------------------------------|------------------------------------------|---------------------------------------------------------|--------------------------------------------------------------------------------------------|
| Kathy                             | Puntil      |                       |                  | UPMC Presbyterian               | United States                            | Researcher                                              |                                                                                            |
| Chelsey                           | Snyder      |                       |                  | UPMC Presbyterian               | United States                            | Coordinator                                             |                                                                                            |
| Linda                             | Spearman    |                       |                  | UPMC Presbyterian               | United States                            | Researcher                                              |                                                                                            |
| Jenny                             | Whitehead   |                       |                  | UPMC Presbyterian               | United States                            | Coordinator                                             |                                                                                            |
| Friederike                        | Keating     |                       |                  | University of Vermont Medical   | United States                            | Principal Investigator                                  |                                                                                            |
| Bhisham                           | Harchandani |                       |                  | University of Vermont Medical   | United States                            | Researcher                                              |                                                                                            |
| Meghan                            | Sesera      |                       |                  | University of Vermont Medical   | United States                            | Researcher                                              |                                                                                            |
| Jonathan                          | Halevy      |                       |                  | University of Vermont Medical   | United States                            | Researcher                                              |                                                                                            |
| Molly                             | Rafferty    |                       |                  | University of Vermont Medical   | United States                            | Coordinator                                             |                                                                                            |
| Marilynn                          | Roth        |                       |                  | University of Vermont Medical   | United States                            | Coordinator                                             |                                                                                            |
| David                             | Kountz      |                       |                  | Jersey Shore University Medical | United States                            | Principal Investigator                                  |                                                                                            |
| Michael                           | Carson      |                       |                  | Jersey Shore University Medical | United States                            | Principal Investigator                                  |                                                                                            |
| Lynda                             | Argenzio    |                       |                  | Jersey Shore University Medical | United States                            | Coordinator                                             |                                                                                            |
| Michael                           | Kontos      |                       |                  | Virginia Commonwealth           | United States                            | Principal Investigator                                  |                                                                                            |
| Melissa                           | Sears       |                       |                  | Virginia Commonwealth           | United States                            | Coordinator                                             |                                                                                            |
| Laura                             | Johnson     |                       |                  | Virginia Commonwealth           | United States                            | Coordinator                                             |                                                                                            |
| Mansoor                           | Qureshi     |                       |                  | St. Joseph Mercy Hospital       | United States                            | Principal Investigator                                  |                                                                                            |
| Ahmad                             | Mizyed      |                       |                  | St. Joseph Mercy Hospital       | United States                            | Co-Investigator                                         |                                                                                            |
| Sarah                             | Whitsett    |                       |                  | St. Joseph Mercy Hospital       | United States                            | Coordinator                                             |                                                                                            |
| Kristina                          | Wippler     |                       |                  | St. Joseph Mercy Hospital       | United States                            | Coordinator                                             |                                                                                            |
| Jay                               | Raval       |                       |                  | University of New Mexico        | United States                            | Principal Investigator                                  |                                                                                            |
| Stacey                            | Clegg       |                       |                  | University of New Mexico        | United States                            | Principal Investigator                                  |                                                                                            |
| Warren                            | Laskey      |                       |                  | University of New Mexico        | United States                            | Principal Investigator                                  |                                                                                            |

Supplemental Online Content: Nonauthor Collaborators

\*Indicates required information. Only first name, last name, and suffix will appear in PubMed.

| *First Name and Middle Initial(s) | *Last Name   | *Suffix (eg, Jr, III) | Academic Degrees | Institution                   | Location (city, state/province, country) | Role or Contribution, eg, chair, principal investigator | Group (if more than 1 Group listed in the byline) and/or Subgroup (eg, Steering Committee) |
|-----------------------------------|--------------|-----------------------|------------------|-------------------------------|------------------------------------------|---------------------------------------------------------|--------------------------------------------------------------------------------------------|
| Judith                            | Mondragon    |                       |                  | University of New Mexico      | United States                            | Coordinator                                             |                                                                                            |
| Tamar                             | Polonsky     |                       |                  | University of Chicago         | United States                            | Principal Investigator                                  |                                                                                            |
| Matthew                           | Carlson      |                       |                  | University of Chicago         | United States                            | Researcher                                              |                                                                                            |
| Catherine                         | Drovetsky    |                       |                  | University of Chicago         | United States                            | Coordinator                                             |                                                                                            |
| Joseph                            | Gutbrod      |                       |                  | University of Chicago         | United States                            | Coordinator                                             |                                                                                            |
| Micah                             | Prochaska    |                       |                  | University of Chicago         | United States                            | Co-Investigator                                         |                                                                                            |
| Maud                              | Jansen       |                       |                  | University of Chicago         | United States                            | Coordinator                                             |                                                                                            |
| Tharani                           | Jeyaram      |                       |                  | University of Chicago         | United States                            | Coordinator                                             |                                                                                            |
| Noora                             | Reffat       |                       |                  | University of Chicago         | United States                            | Coordinator                                             |                                                                                            |
| Rajesh                            | Gupta        |                       |                  | University of Toledo          | United States                            | Principal Investigator                                  |                                                                                            |
| Mujeeb A.                         | Sheikh       |                       |                  | University of Toledo          | United States                            | Principal Investigator                                  |                                                                                            |
| Meghan                            | (Redd) Moore |                       |                  | University of Toledo          | United States                            | Coordinator                                             |                                                                                            |
| Kristin                           | Fisher       |                       |                  | University of Toledo          | United States                            | Research Staff                                          |                                                                                            |
| Jennifer                          | Gilmore      |                       |                  | University of Toledo          | United States                            | Coordinator                                             |                                                                                            |
| Christina                         | Sattler      |                       |                  | University of Toledo          | United States                            | Coordinator                                             |                                                                                            |
| Stephanie                         | Frank        |                       |                  | University of Toledo          | United States                            | Coordinator                                             |                                                                                            |
| Lynne                             | Uhl          |                       |                  | Beth Israel Deaconess         | United States                            | Principal Investigator                                  |                                                                                            |
| Kalon                             | Ho           |                       |                  | Beth Israel Deaconess         | United States                            | Co-Investigator                                         |                                                                                            |
| Hannah                            | Hunsaker     |                       |                  | Beth Israel Deaconess         | United States                            | Researcher                                              |                                                                                            |
| Jenifer                           | Kaufman      |                       |                  | Beth Israel Deaconess         | United States                            | Coordinator                                             |                                                                                            |
| Lauren                            | Lanuto       |                       |                  | Beth Israel Deaconess         | United States                            | Researcher                                              |                                                                                            |
| Jordan                            | Strom        |                       |                  | Beth Israel Deaconess         | United States                            | Co-Investigator                                         |                                                                                            |
| Patricia                          | Tyler        |                       |                  | Beth Israel Deaconess         | United States                            | Coordinator                                             |                                                                                            |
| Paul                              | Mullen       |                       |                  | Memorial Hospital at Gulfport | United States                            | Principal Investigator                                  |                                                                                            |
| Jennifer                          | Ratcliffe    |                       |                  | Memorial Hospital at Gulfport | United States                            | Coordinator                                             |                                                                                            |
| Brandy                            | Williams     |                       |                  | Memorial Hospital at Gulfport | United States                            | Coordinator                                             |                                                                                            |

## Supplemental Online Content: Nonauthor Collaborators

\*Indicates required information. Only first name, last name, and suffix will appear in PubMed.

| *First Name and Middle Initial(s) | *Last Name | *Suffix (eg, Jr, III) | Academic Degrees | Institution                    | Location (city, state/province, country) | Role or Contribution, eg, chair, principal investigator | Group (if more than 1 Group listed in the byline) and/or Subgroup (eg, Steering Committee) |
|-----------------------------------|------------|-----------------------|------------------|--------------------------------|------------------------------------------|---------------------------------------------------------|--------------------------------------------------------------------------------------------|
| Arthur                            | Bracey     |                       |                  | Baylor St Luke's               | United States                            | Principal Investigator                                  |                                                                                            |
| Araceli                           | Boan       |                       |                  | Baylor St Luke's               | United States                            | Coordinator                                             |                                                                                            |
| Gilberto                          | De Freitas |                       |                  | Baylor St Luke's               | United States                            | Coordinator                                             |                                                                                            |
| Samantha                          | Macias     |                       |                  | Baylor St Luke's               | United States                            | Coordinator                                             |                                                                                            |
| George                            | Younis     |                       |                  | Baylor St Luke's               | United States                            | Researcher                                              |                                                                                            |
| William                           | Matthai    |                       |                  | PENN Presbyterian              | United States                            | Principal Investigator                                  |                                                                                            |
| Sameer                            | Khandhar   |                       |                  | PENN Presbyterian              | United States                            | Co-Investigator                                         |                                                                                            |
| Karen                             | Maslowski  |                       |                  | PENN Presbyterian              | United States                            | Coordinator                                             |                                                                                            |
| Nilay                             | Patel      |                       |                  | Massachusetts General Hospital | United States                            | Principal Investigator                                  |                                                                                            |
| Sammy                             | Elmariah   |                       |                  | Massachusetts General Hospital | United States                            | Principal Investigator                                  |                                                                                            |
| Christopher                       | Stowell    |                       |                  | Massachusetts General Hospital | United States                            | Principal Investigator                                  |                                                                                            |
| David                             | Dudzinski  |                       |                  | Massachusetts General Hospital | United States                            | Principal Investigator                                  |                                                                                            |
| Roukoz                            | Abou-Karam |                       |                  | Massachusetts General Hospital | United States                            | Coordinator                                             |                                                                                            |
| Lina                              | Fu         |                       |                  | Massachusetts General Hospital | United States                            | Coordinator                                             |                                                                                            |
| Paris                             | Jamiel     |                       |                  | Massachusetts General Hospital | United States                            | Coordinator                                             |                                                                                            |
| Cristina                          | Brueggeman |                       |                  | Massachusetts General Hospital | United States                            | Coordinator                                             |                                                                                            |
| Gregary                           | Marhefka   |                       |                  | Thomas Jefferson University    | United States                            | Principal Investigator                                  |                                                                                            |
| Blaire                            | Cain       |                       |                  | Thomas Jefferson University    | United States                            | Researcher                                              |                                                                                            |
| Barbara                           | Gallagher  |                       |                  | Thomas Jefferson University    | United States                            | Coordinator                                             |                                                                                            |
| Perry                             | Weinstock  |                       |                  | Cooper University Hospital     | United States                            | Principal Investigator                                  |                                                                                            |
| Janah                             | Aji        |                       |                  | Cooper University Hospital     | United States                            | Co-Investigator                                         |                                                                                            |
| Brian                             | Corbett    |                       |                  | Cooper University Hospital     | United States                            | Co-Investigator                                         |                                                                                            |
| Elias                             | Iliadis    |                       |                  | Cooper University Hospital     | United States                            | Co-Investigator                                         |                                                                                            |

Supplemental Online Content: Nonauthor Collaborators

\*Indicates required information. Only first name, last name, and suffix will appear in PubMed.

| *First Name and Middle Initial(s) | *Last Name        | *Suffix (eg, Jr, III) | Academic Degrees | Institution                | Location (city, state/province, country) | Role or Contribution, eg, chair, principal investigator | Group (if more than 1 Group listed in the byline) and/or Subgroup (eg, Steering Committee) |
|-----------------------------------|-------------------|-----------------------|------------------|----------------------------|------------------------------------------|---------------------------------------------------------|--------------------------------------------------------------------------------------------|
| Patricia                          | Niblack           |                       |                  | Cooper University Hospital | United States                            | Coordinator                                             |                                                                                            |
| Jeffrey                           | Ogbara            |                       |                  | Cooper University Hospital | United States                            | Researcher                                              |                                                                                            |
| Simon                             | Topalian          |                       |                  | Cooper University Hospital | United States                            | Co-Investigator                                         |                                                                                            |
| Leana                             | Abreu             |                       |                  | Cooper University Hospital | United States                            | Coordinator                                             |                                                                                            |
| Amanda                            | Logan             |                       |                  | Cooper University Hospital | United States                            | Coordinator                                             |                                                                                            |
| Amanda                            | Salvatore         |                       |                  | Cooper University Hospital | United States                            | Researcher                                              |                                                                                            |
| Erin                              | Siderio           |                       |                  | Cooper University Hospital | United States                            | Researcher                                              |                                                                                            |
| William                           | Lawson            |                       |                  | Stony Brook University     | United States                            | Principal Investigator                                  |                                                                                            |
| Ruth J.                           | Stein             |                       |                  | Stony Brook University     | United States                            | Coordinator                                             |                                                                                            |
| Samantha                          | Weber-Fishkin     |                       |                  | Stony Brook University     | United States                            | Coordinator                                             |                                                                                            |
| Norma                             | Keller            |                       |                  | NYU Langone Medical Center | United States                            | Principal Investigator                                  |                                                                                            |
| Eugene                            | Yuriditsky        |                       |                  | NYU Langone Medical Center | United States                            | Principal Investigator                                  |                                                                                            |
| Carlos L.                         | Alviar            |                       |                  | NYU Langone Medical Center | United States                            | Co-Investigator                                         |                                                                                            |
| Sripal                            | Bangalore         |                       |                  | NYU Langone Medical Center | United States                            | Co-Investigator                                         |                                                                                            |
| Maria                             | Daly              |                       |                  | NYU Langone Medical Center | United States                            | Coordinator                                             |                                                                                            |
| Dharshini                         | Sivakumaran       |                       |                  | NYU Langone Medical Center | United States                            | Coordinator                                             |                                                                                            |
| Raven                             | Dwyer             |                       |                  | NYU Langone Medical Center | United States                            | Coordinator                                             |                                                                                            |
| Carolina                          | Rodriguez Alvarez |                       |                  | NYU Langone Medical Center | United States                            | Coordinator                                             |                                                                                            |
| Shuaib                            | Ahmad             |                       |                  | NYU Langone Medical Center | United States                            | Coordinator                                             |                                                                                            |
| Michael                           | Thomas            |                       |                  | University of Michigan     | United States                            | Principal Investigator                                  |                                                                                            |
| Allison                           | Schley            |                       |                  | University of Michigan     | United States                            | Coordinator                                             |                                                                                            |
| Gau Shoua                         | Vue               |                       |                  | University of Michigan     | United States                            | Coordinator                                             |                                                                                            |
| Claudia                           | Hochberg          |                       |                  | Boston Medical Center      | United States                            | Principal Investigator                                  |                                                                                            |

Supplemental Online Content: Nonauthor Collaborators

\*Indicates required information. Only first name, last name, and suffix will appear in PubMed.

| *First Name and Middle Initial(s) | *Last Name      | *Suffix (eg, Jr, III) | Academic Degrees | Institution                  | Location (city, state/province, country) | Role or Contribution, eg, chair, principal investigator | Group (if more than 1 Group listed in the byline) and/or Subgroup (eg, Steering Committee) |
|-----------------------------------|-----------------|-----------------------|------------------|------------------------------|------------------------------------------|---------------------------------------------------------|--------------------------------------------------------------------------------------------|
| Omar                              | Siddiqi         |                       |                  | Boston Medical Center        | United States                            | Principal Investigator                                  |                                                                                            |
| Denise                            | Fine            |                       |                  | Boston Medical Center        | United States                            | Coordinator                                             |                                                                                            |
| Alice                             | Jacobs          |                       |                  | Boston Medical Center        | United States                            | Co-Investigator                                         |                                                                                            |
| Joshua                            | Schulman-Marcus |                       |                  | Albany Medical College       | United States                            | Principal Investigator                                  |                                                                                            |
| Mikhail                           | Torosoff        |                       |                  | Albany Medical College       | United States                            | Principal Investigator                                  |                                                                                            |
| Wendy                             | Stewart         |                       |                  | Albany Medical College       | United States                            | Coordinator                                             |                                                                                            |
| Michael                           | Gitter          |                       |                  | Medical College of Wisconsin | United States                            | Principal Investigator                                  |                                                                                            |
| Barbara                           | Shimada-Krouwer |                       |                  | Medical College of Wisconsin | United States                            | Coordinator                                             |                                                                                            |
| Leanne                            | Harmann         |                       |                  | Medical College of Wisconsin | United States                            | Researcher                                              |                                                                                            |
| Matthew                           | Karafin         |                       |                  | Medical College of Wisconsin | United States                            | Co-Investigator                                         |                                                                                            |
| Pranitha                          | Patlolla        |                       |                  | Medical College of Wisconsin | United States                            | Coordinator                                             |                                                                                            |
| Julie                             | Werra           |                       |                  | Medical College of Wisconsin | United States                            | Coordinator                                             |                                                                                            |
| Mary                              | Wexler          |                       |                  | Medical College of Wisconsin | United States                            | Researcher                                              |                                                                                            |
| Xuming                            | Dai             |                       |                  | NYP Queens                   | United States                            | Principal Investigator                                  |                                                                                            |
| Jackson                           | Ng              |                       |                  | NYP Queens                   | United States                            | Coordinator                                             |                                                                                            |
| Asif                              | Adam            |                       |                  | NYP Queens                   | United States                            | Coordinator                                             |                                                                                            |
| Ajini                             | Cherian         |                       |                  | NYP Queens                   | United States                            | Coordinator                                             |                                                                                            |
| Jay                               | Traverse        |                       |                  | Minneapolis Heart Institute  | United States                            | Principal Investigator                                  |                                                                                            |
| Carina                            | Benson          |                       |                  | Minneapolis Heart Institute  | United States                            | Coordinator                                             |                                                                                            |
| Rose                              | Peterson        |                       |                  | Minneapolis Heart Institute  | United States                            | Coordinator                                             |                                                                                            |
| Amy                               | McMeans         |                       |                  | Minneapolis Heart Institute  | United States                            | Researcher                                              |                                                                                            |
| Elizabeth                         | Reedy           |                       |                  | Minneapolis Heart Institute  | United States                            | Researcher                                              |                                                                                            |
| Andrea                            | Sarfolean       |                       |                  | Minneapolis Heart Institute  | United States                            | Coordinator                                             |                                                                                            |

Supplemental Online Content: Nonauthor Collaborators

\*Indicates required information. Only first name, last name, and suffix will appear in PubMed.

| *First Name and Middle Initial(s) | *Last Name  | *Suffix (eg, Jr, III) | Academic Degrees | Institution                                   | Location (city, state/province, country) | Role or Contribution, eg, chair, principal investigator | Group (if more than 1 Group listed in the byline) and/or Subgroup (eg, Steering Committee) |
|-----------------------------------|-------------|-----------------------|------------------|-----------------------------------------------|------------------------------------------|---------------------------------------------------------|--------------------------------------------------------------------------------------------|
| Eric                              | McCamant    |                       |                  | Lancaster General                             | United States                            | Principal Investigator                                  |                                                                                            |
| Jason                             | Scott       |                       |                  | Lancaster General                             | United States                            | Principal Investigator                                  |                                                                                            |
| Michelle                          | Jordan      |                       |                  | Lancaster General                             | United States                            | Researcher                                              |                                                                                            |
| Kay                               | Knepper     |                       |                  | Lancaster General                             | United States                            | Coordinator                                             |                                                                                            |
| Jennifer                          | Nguyen      |                       |                  | Lancaster General                             | United States                            | Research Staff                                          |                                                                                            |
| Deborah                           | Ramsey      |                       |                  | Lancaster General                             | United States                            | Coordinator                                             |                                                                                            |
| Tara                              | Tawil       |                       |                  | Lancaster General                             | United States                            | Researcher                                              |                                                                                            |
| Todd                              | Wood        |                       |                  | Lancaster General                             | United States                            | Researcher                                              |                                                                                            |
| Dhvni                             | Dave        |                       |                  | Lancaster General                             | United States                            | Coordinator                                             |                                                                                            |
| Heidi                             | Testa       |                       |                  | Lancaster General                             | United States                            | Coordinator                                             |                                                                                            |
| Rajesh                            | Swaminathan |                       |                  | Durham VA Medical Center                      | United States                            | Principal Investigator                                  |                                                                                            |
| Sunil                             | Rao         |                       |                  | Durham VA Medical Center / NYU Langone Health | United States                            | Principal Investigator                                  | Steering Committee and Clinical Site                                                       |
| Kathy                             | Aristy      |                       |                  | Durham VA Medical Center                      | United States                            | Coordinator                                             |                                                                                            |
| Mitchell                          | Krucoff     |                       |                  | Durham VA Medical Center                      | United States                            | Co-Investigator                                         |                                                                                            |
| Thomas                            | Povsic      |                       |                  | Durham VA Medical Center                      | United States                            | Co-Investigator                                         |                                                                                            |
| Andrew M.                         | Goldswieg   |                       |                  | University of Nebraska Medical Center         | United States                            | Principal Investigator                                  | Clinical Site and Steering Committee                                                       |
| Shahbaz                           | Malik       |                       |                  | University of Nebraska Medical Center         | United States                            | Principal Investigator                                  |                                                                                            |
| Yiannis                           | Chatzizisis |                       |                  | University of Nebraska Medical Center         | United States                            | Researcher                                              |                                                                                            |
| John                              | Higgins     |                       |                  | University of Nebraska Medical Center         | United States                            | Researcher                                              |                                                                                            |
| Poonam                            | Velagapudi  |                       |                  | University of Nebraska Medical Center         | United States                            | Researcher                                              |                                                                                            |
| David                             | Barton      |                       |                  | University of Nebraska Medical Center         | United States                            | Researcher                                              |                                                                                            |

## Supplemental Online Content: Nonauthor Collaborators

\*Indicates required information. Only first name, last name, and suffix will appear in PubMed.

| *First Name and Middle Initial(s) | *Last Name | *Suffix (eg, Jr, III) | Academic Degrees | Institution                           | Location (city, state/province, country) | Role or Contribution, eg, chair, principal investigator | Group (if more than 1 Group listed in the byline) and/or Subgroup (eg, Steering Committee) |
|-----------------------------------|------------|-----------------------|------------------|---------------------------------------|------------------------------------------|---------------------------------------------------------|--------------------------------------------------------------------------------------------|
| Jeremy                            | Stone      |                       |                  | University of Nebraska Medical Center | United States                            | Researcher                                              |                                                                                            |
| Samer                             | Sayyed     |                       |                  | University of Nebraska Medical Center | United States                            | Researcher                                              |                                                                                            |
| Arav                              | Jhand      |                       |                  | University of Nebraska Medical Center | United States                            | Researcher                                              |                                                                                            |
| Daniel                            | Johnson    |                       |                  | University of Nebraska Medical Center | United States                            | Researcher                                              |                                                                                            |
| James                             | Sullivan   |                       |                  | University of Nebraska Medical Center | United States                            | Researcher                                              |                                                                                            |
| Furquan                           | Khattak    |                       |                  | University of Nebraska Medical Center | United States                            | Researcher                                              |                                                                                            |
| Kara                              | Stout      |                       |                  | University of Nebraska Medical Center | United States                            | Researcher                                              |                                                                                            |
| Jennifer                          | Nickol     |                       |                  | University of Nebraska Medical Center | United States                            | Co-Investigator                                         |                                                                                            |
| David                             | Shin       |                       |                  | University of Nebraska Medical Center | United States                            | Co-Investigator                                         |                                                                                            |
| Mansi                             | Oberoi     |                       |                  | University of Nebraska Medical Center | United States                            | Co-Investigator                                         |                                                                                            |
| Taylor                            | Johnson    |                       |                  | University of Nebraska Medical Center | United States                            | Coordinator                                             |                                                                                            |
| Melissa                           | Howard     |                       |                  | University of Nebraska Medical Center | United States                            | Researcher                                              |                                                                                            |
| Zaria                             | Starfeldt  |                       |                  | University of Nebraska Medical Center | United States                            | Coordinator                                             |                                                                                            |
| Ryan                              | Ruskamp    |                       |                  | University of Nebraska Medical Center | United States                            | Coordinator                                             |                                                                                            |
| Nathan                            | Muhn       |                       |                  | University of Nebraska Medical Center | United States                            | Coordinator                                             |                                                                                            |

Supplemental Online Content: Nonauthor Collaborators

\*Indicates required information. Only first name, last name, and suffix will appear in PubMed.

| *First Name and Middle Initial(s) | *Last Name | *Suffix (eg, Jr, III) | Academic Degrees | Institution                           | Location (city, state/province, country) | Role or Contribution, eg, chair, principal investigator | Group (if more than 1 Group listed in the byline) and/or Subgroup (eg, Steering Committee) |
|-----------------------------------|------------|-----------------------|------------------|---------------------------------------|------------------------------------------|---------------------------------------------------------|--------------------------------------------------------------------------------------------|
| Camila                            | Pacheco    |                       |                  | University of Nebraska Medical Center | United States                            | Coordinator                                             |                                                                                            |
| Tyler                             | Patterson  |                       |                  | University of Nebraska Medical Center | United States                            | Researcher                                              |                                                                                            |
| Angie                             | Adler      |                       |                  | University of Nebraska Medical Center | United States                            | Researcher                                              |                                                                                            |
| Andrew P.                         | DeFilippis |                       |                  | Vanderbilt                            | United States                            | Principal Investigator                                  | Clinical Site and Steering Committee                                                       |
| Karita                            | Lidani     |                       |                  | Vanderbilt                            | United States                            | Coordinator                                             |                                                                                            |
| Cassandra                         | Reynolds   |                       |                  | Vanderbilt                            | United States                            | Researcher                                              |                                                                                            |
| Nicholas                          | Brooks     |                       |                  | Vanderbilt                            | United States                            | Coordinator                                             |                                                                                            |
| Stephan                           | Bierenga   |                       |                  | Vanderbilt                            | United States                            | Coordinator                                             |                                                                                            |
| Adam C.                           | Salisbury  |                       |                  | Saint Luke's Mid America Heart        | United States                            | Principal Investigator                                  |                                                                                            |
| Jamie                             | Hall       |                       |                  | Saint Luke's Mid America Heart        | United States                            | Coordinator                                             |                                                                                            |
| David                             | Landers    |                       |                  | Hackensack University Medical         | United States                            | Principal Investigator                                  |                                                                                            |
| Robert                            | Hendel     |                       |                  | Tulane Medical Center                 | United States                            | Principal Investigator                                  |                                                                                            |
| Wilson                            | Ginete     |                       |                  | Essentia Health                       | United States                            | Principal Investigator                                  |                                                                                            |
| Ganesh                            | Raveendran |                       |                  | University of Minnesota               | United States                            | Principal Investigator                                  |                                                                                            |
| Craig                             | Hudak      |                       |                  | Greenville Health System              | United States                            | Principal Investigator                                  |                                                                                            |
| Ramin                             | Ebrahimi   |                       |                  | UCLA / Veterans Affairs Greater LA    | United States                            | Principal Investigator                                  |                                                                                            |
| Richard                           | Bach       |                       |                  | Washington University St Louis        | United States                            | Principal Investigator                                  |                                                                                            |
| Margie                            | Palazzolo  |                       |                  | Washington University St Louis        | United States                            | Coordinator                                             |                                                                                            |
| Kimberly                          | Striler    |                       |                  | Washington University St Louis        | United States                            | Researcher                                              |                                                                                            |



## Supplemental Online Content: Nonauthor Collaborators

\*Indicates required information. Only first name, last name, and suffix will appear in PubMed.

| *First Name and Middle Initial(s) | *Last Name           | *Suffix (eg, Jr, III) | Academic Degrees | Institution                                                                             | Location (city, state/province, country) | Role or Contribution, eg, chair, principal investigator | Group (if more than 1 Group listed in the byline) and/or Subgroup (eg, Steering Committee) |
|-----------------------------------|----------------------|-----------------------|------------------|-----------------------------------------------------------------------------------------|------------------------------------------|---------------------------------------------------------|--------------------------------------------------------------------------------------------|
| Paolo                             | Mascari              |                       |                  | Lahey Hospital                                                                          | United States                            | Principal Investigator                                  |                                                                                            |
| Hal                               | Wasserman            |                       |                  | Danbury Hospital                                                                        | United States                            | Principal Investigator                                  |                                                                                            |
| Joseph                            | Delehanty            |                       |                  | University of Rochester                                                                 | United States                            | Principal Investigator                                  |                                                                                            |
| Raj C.                            | Shah                 |                       |                  | Rush University Medical Center                                                          | United States                            | Principal Investigator                                  |                                                                                            |
| Lesley A.                         | Schmaltz             |                       |                  | Rush University Medical Center                                                          | United States                            | Researcher                                              |                                                                                            |
| Steve                             | Attanasio            |                       |                  | Rush University Medical Center                                                          | United States                            | Researcher                                              |                                                                                            |
| Sorin                             | Brener               |                       |                  | NYP Brooklyn Methodist                                                                  | United States                            | Principal Investigator                                  |                                                                                            |
| Brendan                           | Duffy                |                       |                  | Aultman Cardiology                                                                      | United States                            | Principal Investigator                                  |                                                                                            |
| Paul                              | Grunenwald           |                       |                  | Alexian Brothers Medical Center - Alexian Brothers Medical , St. Alexius Medical Center | United States                            | Principal Investigator                                  |                                                                                            |
| Jonathan                          | Doroshov             |                       |                  | Lankenau Medical Center                                                                 | United States                            | Principal Investigator                                  |                                                                                            |
| Muhammad Abubakar                 | Shakir               |                       |                  | Lankenau Medical Center                                                                 | United States                            | Researcher                                              |                                                                                            |
| Adriano                           | Caixeta              |                       |                  | Hospital São Paulo                                                                      | Brazil                                   | Principal Investigator                                  |                                                                                            |
| Attilio                           | Galhardo             |                       |                  | Hospital São Paulo                                                                      | Brazil                                   | Coordinator                                             |                                                                                            |
| Paula                             | Santiago Teixeira    |                       |                  | Hospital São Paulo                                                                      | Brazil                                   | Co-Investigator                                         |                                                                                            |
| Joyce                             | Umbelino S. Yamamoto |                       |                  | Hospital São Paulo                                                                      | Brazil                                   | Coordinator                                             |                                                                                            |
| Dalton                            | Precoma              |                       |                  | Sociedade Hospitalar Angelina Caron                                                     | Brazil                                   | Principal Investigator                                  |                                                                                            |

## Supplemental Online Content: Nonauthor Collaborators

\*Indicates required information. Only first name, last name, and suffix will appear in PubMed.

| *First Name and Middle Initial(s) | *Last Name             | *Suffix (eg, Jr, III) | Academic Degrees | Institution                                       | Location (city, state/province, country) | Role or Contribution, eg, chair, principal investigator | Group (if more than 1 Group listed in the byline) and/or Subgroup (eg, Steering Committee) |
|-----------------------------------|------------------------|-----------------------|------------------|---------------------------------------------------|------------------------------------------|---------------------------------------------------------|--------------------------------------------------------------------------------------------|
| Cristina                          | Correa                 |                       |                  | Sociedade Hospitalar Angelina Caron               | Brazil                                   | Researcher                                              |                                                                                            |
| Maynara                           | Martins                |                       |                  | Sociedade Hospitalar Angelina Caron               | Brazil                                   | Coordinator                                             |                                                                                            |
| Carlos                            | Rochitti               |                       |                  | Sociedade Hospitalar Angelina Caron               | Brazil                                   | Researcher                                              |                                                                                            |
| Camila                            | Richter                |                       |                  | Sociedade Hospitalar Angelina Caron               | Brazil                                   | Researcher                                              |                                                                                            |
| Carlos A.K.                       | Nakashima              |                       |                  | Sociedade Hospitalar Angelina Caron               | Brazil                                   | Researcher                                              |                                                                                            |
| Eliane                            | Sehnm                  |                       |                  | Sociedade Hospitalar Angelina Caron               | Brazil                                   | Researcher                                              |                                                                                            |
| Frederico                         | Toledo Campo Dall'Orto |                       |                  | Hospital Maternidade e Pronto Socorro Santa Lucia | Brazil                                   | Principal Investigator                                  |                                                                                            |
| Gislayne                          | Rogante Ribeiro        |                       |                  | Hospital Maternidade e Pronto Socorro Santa Lucia | Brazil                                   | Coordinator                                             |                                                                                            |
| Ricardo Reinaldo                  | Bergo                  |                       |                  | Hospital Maternidade e Pronto Socorro Santa Lucia | Brazil                                   | Researcher                                              |                                                                                            |
| Claire Marie                      | Pedroso Dias Corsini   |                       |                  | Hospital Maternidade e Pronto Socorro Santa Lucia | Brazil                                   | Researcher                                              |                                                                                            |
| Kemilys Marine                    | Ferreira               |                       |                  | Hospital Maternidade e Pronto Socorro Santa Lucia | Brazil                                   | Researcher                                              |                                                                                            |
| Pedro B.                          | De Andrade             |                       |                  | Santa Casa de Marília                             | Brazil                                   | Principal Investigator                                  |                                                                                            |
| Robson A.                         | Barbosa                |                       |                  | Santa Casa de Marília                             | Brazil                                   | Researcher                                              |                                                                                            |
| Marianna                          | Dracoulakis            |                       |                  | Hospital da Bahia                                 | Brazil                                   | Principal Investigator                                  |                                                                                            |
| Natalia                           | Alvaia                 |                       |                  | Hospital da Bahia                                 | Brazil                                   | Coordinator                                             |                                                                                            |
| Rodolfo                           | Dourado                |                       |                  | Hospital da Bahia                                 | Brazil                                   | Co-Investigator                                         |                                                                                            |
| Jéssica                           | Ribeiro                |                       |                  | Hospital da Bahia                                 | Brazil                                   | Researcher                                              |                                                                                            |
| Camilla                           | Vieira                 |                       |                  | Hospital da Bahia                                 | Brazil                                   | Coordinator                                             |                                                                                            |

## Supplemental Online Content: Nonauthor Collaborators

\*Indicates required information. Only first name, last name, and suffix will appear in PubMed.

| *First Name and Middle Initial(s) | *Last Name           | *Suffix (eg, Jr, III) | Academic Degrees | Institution                    | Location (city, state/province, country) | Role or Contribution, eg, chair, principal investigator | Group (if more than 1 Group listed in the byline) and/or Subgroup (eg, Steering Committee) |
|-----------------------------------|----------------------|-----------------------|------------------|--------------------------------|------------------------------------------|---------------------------------------------------------|--------------------------------------------------------------------------------------------|
| Taís                              | Sarmiento            |                       |                  | Hospital da Bahia              | Brazil                                   | Researcher                                              |                                                                                            |
| Aline                             | Giacomo              |                       |                  | Hospital da Bahia              | Brazil                                   | Researcher                                              |                                                                                            |
| Mariana                           | Lopes                |                       |                  | Hospital da Bahia              | Brazil                                   | Researcher                                              |                                                                                            |
| Lília N.                          | Maia                 |                       |                  | Hospital de Base de Rio Preto  | Brazil                                   | Principal Investigator                                  |                                                                                            |
| Osana                             | Costa                |                       |                  | Hospital de Base de Rio Preto  | Brazil                                   | Researcher                                              |                                                                                            |
| Paulo Jhones                      | Dutra                |                       |                  | Hospital de Base de Rio Preto  | Brazil                                   | Researcher                                              |                                                                                            |
| Danieli                           | Frassatto            |                       |                  | Hospital de Base de Rio Preto  | Brazil                                   | Researcher                                              |                                                                                            |
| Juliana Vieira                    | Garcia               |                       |                  | Hospital de Base de Rio Preto  | Brazil                                   | Researcher                                              |                                                                                            |
| Maria Angélica                    | Lemos                |                       |                  | Hospital de Base de Rio Preto  | Brazil                                   | Researcher                                              |                                                                                            |
| Thaise                            | Loverdi              |                       |                  | Hospital de Base de Rio Preto  | Brazil                                   | Researcher                                              |                                                                                            |
| Marcelo                           | Nakazone             |                       |                  | Hospital de Base de Rio Preto  | Brazil                                   | Researcher                                              |                                                                                            |
| Nadielly                          | Prado                |                       |                  | Hospital de Base de Rio Preto  | Brazil                                   | Researcher                                              |                                                                                            |
| Oswaldo                           | Da Silva Júnior      |                       |                  | Hospital de Base de Rio Preto  | Brazil                                   | Researcher                                              |                                                                                            |
| Natalia                           | Cordeiro da Silva    |                       |                  | Hospital de Base de Rio Preto  | Brazil                                   | Researcher                                              |                                                                                            |
| Sidney                            | Gomes                |                       |                  | Hospital de Base de Rio Preto  | Brazil                                   | Researcher                                              |                                                                                            |
| Anna Helena Felipe Pereira        | Centurione           |                       |                  | Hospital de Base de Rio Preto  | Brazil                                   | Researcher                                              |                                                                                            |
| Luiz Eduardo                      | Fontelles Ritt       |                       |                  | Hospital Córdio Pulmonar       | Brazil                                   | Principal Investigator                                  |                                                                                            |
| Queila                            | Borges De Oliveira   |                       |                  | Hospital Córdio Pulmonar       | Brazil                                   | Researcher                                              |                                                                                            |
| Karina                            | De Carvalho Cordeiro |                       |                  | Hospital Córdio Pulmonar       | Brazil                                   | Researcher                                              |                                                                                            |
| Alexandre                         | Quadros              |                       |                  | Instituto de Cardiologia do RS | Brazil                                   | Principal Investigator                                  |                                                                                            |
| Giulia                            | Bonatto              |                       |                  | Instituto de Cardiologia do RS | Brazil                                   | Co-Investigator                                         |                                                                                            |
| Bruna                             | Machado              |                       |                  | Instituto de Cardiologia do RS | Brazil                                   | Coordinator                                             |                                                                                            |
| Silvia                            | Poleth               |                       |                  | Instituto de Cardiologia do RS | Brazil                                   | Researcher                                              |                                                                                            |
| Camille                           | Correia              |                       |                  | Instituto de Cardiologia do RS | Brazil                                   | Researcher                                              |                                                                                            |

## Supplemental Online Content: Nonauthor Collaborators

\*Indicates required information. Only first name, last name, and suffix will appear in PubMed.

| *First Name and Middle Initial(s) | *Last Name               | *Suffix (eg, Jr, III) | Academic Degrees | Institution                                       | Location (city, state/province, country) | Role or Contribution, eg, chair, principal investigator | Group (if more than 1 Group listed in the byline) and/or Subgroup (eg, Steering Committee) |
|-----------------------------------|--------------------------|-----------------------|------------------|---------------------------------------------------|------------------------------------------|---------------------------------------------------------|--------------------------------------------------------------------------------------------|
| Raphael                           | Guimarães                |                       |                  | Instituto de Cardiologia do RS                    | Brazil                                   | Researcher                                              |                                                                                            |
| Israel                            | Cabral                   |                       |                  | Instituto de Cardiologia do RS                    | Brazil                                   | Researcher                                              |                                                                                            |
| Dário Celestino                   | Sobral Filho             |                       |                  | Pronto Socorro Cardiológico de Prof. Luiz Tavares | Brazil                                   | Principal Investigator                                  |                                                                                            |
| Maria Cleide Freire Clementino    | Silva                    |                       |                  | Pronto Socorro Cardiológico de Prof. Luiz Tavares | Brazil                                   | Researcher                                              |                                                                                            |
| Osmário                           | Tavares De Carvalho      |                       |                  | Pronto Socorro Cardiológico de Prof. Luiz Tavares | Brazil                                   | Researcher                                              |                                                                                            |
| José Gildo                        | De Moura Monteiro Júnior |                       |                  | Pronto Socorro Cardiológico de Prof. Luiz Tavares | Brazil                                   | Researcher                                              |                                                                                            |
| Sergio                            | Nascimento               |                       |                  | Pronto Socorro Cardiológico de Prof. Luiz Tavares | Brazil                                   | Researcher                                              |                                                                                            |
| Fernando                          | De Martino               |                       |                  | Hospital de Clinicas UFTM                         | Brazil                                   | Principal Investigator                                  |                                                                                            |
| Paula M.                          | Camasmie                 |                       |                  | Hospital de Clinicas UFTM                         | Brazil                                   | Coordinator                                             |                                                                                            |
| Leonilda                          | Castanho Da Rocha        |                       |                  | Hospital de Clinicas UFTM                         | Brazil                                   | Researcher                                              |                                                                                            |
| Pâmela Joice R.                   | De Oliveira Assunção     |                       |                  | Hospital de Clinicas UFTM                         | Brazil                                   | Researcher                                              |                                                                                            |
| Fábio                             | Rodrigues de Oliveira    |                       |                  | Hospital de Clinicas UFTM                         | Brazil                                   | Researcher                                              |                                                                                            |
| Paulo H.M.                        | Vilela                   |                       |                  | Hospital de Clinicas UFTM                         | Brazil                                   | Researcher                                              |                                                                                            |
| Rodrigo Cunha                     | de Sousa                 |                       |                  | Hospital de Clinicas UFTM                         | Brazil                                   | Researcher                                              |                                                                                            |
| Estevão L.                        | Figueiredo               |                       |                  | Instituto Orizonti - NUPEC                        | Brazil                                   | Principal Investigator                                  |                                                                                            |
| Fernando Carvalho                 | Neuenschwander           |                       |                  | Instituto Orizonti - NUPEC                        | Brazil                                   | Researcher                                              |                                                                                            |
| Cristina Carvalho                 | Neuenschwander           |                       |                  | Instituto Orizonti - NUPEC                        | Brazil                                   | Researcher                                              |                                                                                            |
| Izabela R.                        | Falco                    |                       |                  | Instituto Orizonti - NUPEC                        | Brazil                                   | Coordinator                                             |                                                                                            |
| Arlete                            | Matos                    |                       |                  | Instituto Orizonti - NUPEC                        | Brazil                                   | Researcher                                              |                                                                                            |

## Supplemental Online Content: Nonauthor Collaborators

\*Indicates required information. Only first name, last name, and suffix will appear in PubMed.

| *First Name and Middle Initial(s) | *Last Name      | *Suffix (eg, Jr, III) | Academic Degrees | Institution                                                                                                   | Location (city, state/province, country) | Role or Contribution, eg, chair, principal investigator | Group (if more than 1 Group listed in the byline) and/or Subgroup (eg, Steering Committee) |
|-----------------------------------|-----------------|-----------------------|------------------|---------------------------------------------------------------------------------------------------------------|------------------------------------------|---------------------------------------------------------|--------------------------------------------------------------------------------------------|
| Thao                              | Huynh           |                       |                  | Montreal General Hospital                                                                                     | Canada                                   | Principal Investigator                                  |                                                                                            |
| Nancy                             | Fuentes         |                       |                  | Montreal General Hospital                                                                                     | Canada                                   | Researcher                                              |                                                                                            |
| Amanda                            | Barnett         |                       |                  | Montreal General Hospital                                                                                     | Canada                                   | Researcher                                              |                                                                                            |
| Caroline                          | Boudreault      |                       |                  | Montreal General Hospital                                                                                     | Canada                                   | Coordinator                                             |                                                                                            |
| Greg                              | Schnell         |                       |                  | Foothills Medical Centre                                                                                      | Canada                                   | Principal Investigator                                  |                                                                                            |
| Leslie                            | Poirier         |                       |                  | Foothills Medical Centre                                                                                      | Canada                                   | Coordinator                                             |                                                                                            |
| Darlene                           | Ramadan         |                       |                  | Foothills Medical Centre                                                                                      | Canada                                   | Coordinator                                             |                                                                                            |
| Manohara                          | Senaratne       |                       |                  | Grey Nuns Community Hospital                                                                                  | Canada                                   | Principal Investigator                                  |                                                                                            |
| Bernadette                        | Fernando        |                       |                  | Grey Nuns Community Hospital                                                                                  | Canada                                   | Coordinator                                             |                                                                                            |
| Mike                              | Hanninen        |                       |                  | Grey Nuns Community Hospital                                                                                  | Canada                                   | Co-Investigator                                         |                                                                                            |
| Anushka                           | Jayasekara      |                       |                  | Grey Nuns Community Hospital                                                                                  | Canada                                   | Researcher                                              |                                                                                            |
| Janek                             | Senaratne       |                       |                  | Grey Nuns Community Hospital and University Of Alberta Hospital                                               | Canada                                   | Co-Investigator                                         |                                                                                            |
| Lalantha                          | Coonghe         |                       |                  | Grey Nuns Community Hospital                                                                                  | Canada                                   | Coordinator                                             |                                                                                            |
| Sharada                           | Manchikanti     |                       |                  | Grey Nuns Community Hospital                                                                                  | Canada                                   | Coordinator                                             |                                                                                            |
| Gamintha                          | Nanayakkara     |                       |                  | Grey Nuns Community Hospital                                                                                  | Canada                                   | Coordinator                                             |                                                                                            |
| Vikas                             | Tandon          |                       |                  | Hamilton Health Sciences/St. Joseph's Healthcare Hamilton - Hamilton General Hospital and Juravinski Hospital | Canada                                   | Principal Investigator                                  |                                                                                            |
| Patricia                          | Power           |                       |                  | Hamilton Health Sciences/St. Joseph's Healthcare Hamilton - Hamilton General Hospital                         | Canada                                   | Coordinator                                             |                                                                                            |
| Ryan                              | Proc            |                       |                  | Hamilton Health Sciences/St. Joseph's Healthcare Hamilton - Hamilton General Hospital                         | Canada                                   | Researcher                                              |                                                                                            |
| Kajenny                           | Srivaratharajah |                       |                  | Hamilton Health Sciences/St. Joseph's Healthcare Hamilton - Hamilton General Hospital                         | Canada                                   | Co-Investigator                                         |                                                                                            |

Supplemental Online Content: Nonauthor Collaborators

\*Indicates required information. Only first name, last name, and suffix will appear in PubMed.

| *First Name and Middle Initial(s) | *Last Name | *Suffix (eg, Jr, III) | Academic Degrees | Institution                                                                                  | Location (city, state/province, country) | Role or Contribution, eg, chair, principal investigator | Group (if more than 1 Group listed in the byline) and/or Subgroup (eg, Steering Committee) |
|-----------------------------------|------------|-----------------------|------------------|----------------------------------------------------------------------------------------------|------------------------------------------|---------------------------------------------------------|--------------------------------------------------------------------------------------------|
| Lisa                              | Trombetta  |                       |                  | Hamilton Health Sciences/St. Joseph's Healthcare Hamilton - Hamilton General Hospital        | Canada                                   | Coordinator                                             |                                                                                            |
| Pablo                             | Mendoza    |                       |                  | Hamilton Health Sciences/St. Joseph's Healthcare Hamilton - Hamilton General Hospital        | Canada                                   | Researcher                                              |                                                                                            |
| Krysten                           | Gregus     |                       |                  | Hamilton Health Sciences/St. Joseph's Healthcare Hamilton - Juravinski Hospital              | Canada                                   | Coordinator                                             |                                                                                            |
| Jacqueline                        | Hare       |                       |                  | Hamilton Health Sciences/St. Joseph's Healthcare Hamilton - Juravinski Hospital              | Canada                                   | Coordinator                                             |                                                                                            |
| Kelly                             | Lawrence   |                       |                  | Hamilton Health Sciences/St. Joseph's Healthcare Hamilton - Juravinski Hospital              | Canada                                   | Coordinator                                             |                                                                                            |
| Ameen                             | Patel      |                       |                  | Hamilton Health Sciences/St. Joseph's Healthcare Hamilton - Juravinski Hospital              | Canada                                   | Co-Investigator                                         |                                                                                            |
| Shirley                           | Pettit     |                       |                  | Hamilton Health Sciences/St. Joseph's Healthcare Hamilton - Juravinski Hospital              | Canada                                   | Researcher                                              |                                                                                            |
| Jocelyn                           | Kuber      |                       |                  | Hamilton Health Sciences/St. Joseph's Healthcare Hamilton - Juravinski Hospital              | Canada                                   | Coordinator                                             |                                                                                            |
| Summer                            | Nasr       |                       |                  | Hamilton Health Sciences/St. Joseph's Healthcare Hamilton - Juravinski Hospital              | Canada                                   | Coordinator                                             |                                                                                            |
| John                              | Neary      |                       |                  | Hamilton Health Sciences/St. Joseph's Healthcare Hamilton - St. Joseph's Healthcare Hamilton | Canada                                   | Principal Investigator                                  |                                                                                            |

Supplemental Online Content: Nonauthor Collaborators

\*Indicates required information. Only first name, last name, and suffix will appear in PubMed.

| *First Name and Middle Initial(s) | *Last Name      | *Suffix (eg, Jr, III) | Academic Degrees | Institution                                                                                  | Location (city, state/province, country) | Role or Contribution, eg, chair, principal investigator | Group (if more than 1 Group listed in the byline) and/or Subgroup (eg, Steering Committee) |
|-----------------------------------|-----------------|-----------------------|------------------|----------------------------------------------------------------------------------------------|------------------------------------------|---------------------------------------------------------|--------------------------------------------------------------------------------------------|
| Muammar                           | Abdulrahman     |                       |                  | Hamilton Health Sciences/St. Joseph's Healthcare Hamilton - St. Joseph's Healthcare Hamilton | Canada                                   | Coordinator                                             |                                                                                            |
| David                             | Cohen           |                       |                  | Hamilton Health Sciences/St. Joseph's Healthcare Hamilton - St. Joseph's Healthcare Hamilton | Canada                                   | Co-Investigator                                         |                                                                                            |
| Yola                              | El Dahr         |                       |                  | Hamilton Health Sciences/St. Joseph's Healthcare Hamilton - St. Joseph's Healthcare Hamilton | Canada                                   | Coordinator                                             |                                                                                            |
| Faraaz                            | Quraishi        |                       |                  | Hamilton Health Sciences/St. Joseph's Healthcare Hamilton - St. Joseph's Healthcare Hamilton | Canada                                   | Researcher                                              |                                                                                            |
| Laura                             | Tomat           |                       |                  | Hamilton Health Sciences/St. Joseph's Healthcare Hamilton - St. Joseph's Healthcare Hamilton | Canada                                   | Coordinator                                             |                                                                                            |
| Spencer                           | Wikkerink       |                       |                  | Hamilton Health Sciences/St. Joseph's Healthcare Hamilton - St. Joseph's Healthcare Hamilton | Canada                                   | Coordinator                                             |                                                                                            |
| David                             | Laflamme        |                       |                  | Hôpital Charles Lemoyne                                                                      | Canada                                   | Principal Investigator                                  |                                                                                            |
| Miriam                            | Schnorr Meloche |                       |                  | Hôpital Charles Lemoyne                                                                      | Canada                                   | Coordinator                                             |                                                                                            |
| Christel                          | Simard          |                       |                  | Hôpital Charles Lemoyne                                                                      | Canada                                   | Coordinator                                             |                                                                                            |
| Lise                              | Blais           |                       |                  | Hôpital Charles Lemoyne                                                                      | Canada                                   | Coordinator                                             |                                                                                            |

## Supplemental Online Content: Nonauthor Collaborators

\*Indicates required information. Only first name, last name, and suffix will appear in PubMed.

| *First Name and Middle Initial(s) | *Last Name | *Suffix (eg, Jr, III) | Academic Degrees | Institution                            | Location (city, state/province, country) | Role or Contribution, eg, chair, principal investigator | Group (if more than 1 Group listed in the byline) and/or Subgroup (eg, Steering Committee) |
|-----------------------------------|------------|-----------------------|------------------|----------------------------------------|------------------------------------------|---------------------------------------------------------|--------------------------------------------------------------------------------------------|
| Jean-Pierre                       | Dery       |                       |                  | Quebec Heart and Lung Institute        | Canada                                   | Principal Investigator                                  |                                                                                            |
| Christina                         | Avena-Cyr  |                       |                  | Quebec Heart and Lung Institute        | Canada                                   | Coordinator                                             |                                                                                            |
| Melanie                           | Roy        |                       |                  | Quebec Heart and Lung Institute        | Canada                                   | Coordinator                                             |                                                                                            |
| Micheline                         | Charron    |                       |                  | Quebec Heart and Lung Institute        | Canada                                   | Coordinator                                             |                                                                                            |
| Kevin                             | Bainey     |                       |                  | University Of Alberta Hospital         | Canada                                   | Principal Investigator                                  |                                                                                            |
| Norma                             | Hogg       |                       |                  | University Of Alberta Hospital         | Canada                                   | Coordinator                                             |                                                                                            |
| Suzanne                           | Welshsan   |                       |                  | University Of Alberta Hospital         | Canada                                   | Coordinator                                             |                                                                                            |
| Richard                           | Haichin    |                       |                  | Royal Victoria Hospital                | Canada                                   | Principal Investigator                                  |                                                                                            |
| Coralie                           | Gasc       |                       |                  | Royal Victoria Hospital                | Canada                                   | Coordinator                                             |                                                                                            |
| Reza                              | Sahebjamei |                       |                  | Royal Victoria Hospital                | Canada                                   | Coordinator                                             |                                                                                            |
| Fatemeh                           | Vaezi-Poor |                       |                  | Royal Victoria Hospital                | Canada                                   | Researcher                                              |                                                                                            |
| Payam                             | Dehghani   |                       |                  | Regina General Hospital                | Canada                                   | Principal Investigator                                  |                                                                                            |
| Sabiha                            | Sultana    |                       |                  | Regina General Hospital                | Canada                                   | Coordinator                                             |                                                                                            |
| Ata Ur Rehman                     | Quraishi   |                       |                  | QE II Health Sciences Center           | Canada                                   | Principal Investigator                                  |                                                                                            |
| Hussein                           | Beydoun    |                       |                  | QE II Health Sciences Center           | Canada                                   | Co-Investigator                                         |                                                                                            |
| David                             | Fillmore   |                       |                  | QE II Health Sciences Center           | Canada                                   | Coordinator                                             |                                                                                            |
| Deborah                           | Keller     |                       |                  | QE II Health Sciences Center           | Canada                                   | Coordinator                                             |                                                                                            |
| Nick                              | Bartlett   |                       |                  | QE II Health Sciences Center           | Canada                                   | Coordinator                                             |                                                                                            |
| Brian J.                          | Potter     |                       |                  | Centre Hosp. Universitaire de Montreal | Canada                                   | Principal Investigator                                  |                                                                                            |
| François M.                       | Carrier    |                       |                  | Centre Hosp. Universitaire de Montreal | Canada                                   | Principal Investigator                                  |                                                                                            |



Supplemental Online Content: Nonauthor Collaborators

\*Indicates required information. Only first name, last name, and suffix will appear in PubMed.

| *First Name and Middle Initial(s) | *Last Name     | *Suffix (eg, Jr, III) | Academic Degrees | Institution                            | Location (city, state/province, country) | Role or Contribution, eg, chair, principal investigator | Group (if more than 1 Group listed in the byline) and/or Subgroup (eg, Steering Committee) |
|-----------------------------------|----------------|-----------------------|------------------|----------------------------------------|------------------------------------------|---------------------------------------------------------|--------------------------------------------------------------------------------------------|
| Fatna                             | Benettaib      |                       |                  | Centre Hosp. Universitaire de Montreal | Canada                                   | Coordinator                                             |                                                                                            |
| Adriana                           | Carbonaro      |                       |                  | Centre Hosp. Universitaire de Montreal | Canada                                   | Researcher                                              |                                                                                            |
| Isabelle                          | Chausse        |                       |                  | Centre Hosp. Universitaire de Montreal | Canada                                   | Researcher                                              |                                                                                            |
| Katherine                         | Coutu-Beaudry  |                       |                  | Centre Hosp. Universitaire de Montreal | Canada                                   | Coordinator                                             |                                                                                            |
| Maya                              | Hatwik         |                       |                  | Centre Hosp. Universitaire de Montreal | Canada                                   | Research Staff                                          |                                                                                            |
| Martine                           | Lebrasseur     |                       |                  | Centre Hosp. Universitaire de Montreal | Canada                                   | Coordinator                                             |                                                                                            |
| Cindy                             | Prié           |                       |                  | Centre Hosp. Universitaire de Montreal | Canada                                   | Coordinator                                             |                                                                                            |
| Caroline                          | Vallières      |                       |                  | Centre Hosp. Universitaire de Montreal | Canada                                   | Coordinator                                             |                                                                                            |
| Dounia                            | Boumahni       |                       |                  | Centre Hosp. Universitaire de Montreal | Canada                                   | Coordinator                                             |                                                                                            |
| Genevieve                         | Dallaire       |                       |                  | Centre Hosp. Universitaire de Montreal | Canada                                   | Coordinator                                             |                                                                                            |
| Renée                             | Duclos         |                       |                  | Centre Hosp. Universitaire de Montreal | Canada                                   | Coordinator                                             |                                                                                            |
| Ali                               | Ghamraoui      |                       |                  | Centre Hosp. Universitaire de Montreal | Canada                                   | Coordinator                                             |                                                                                            |
| Mélissa                           | Gagnon-Hamelin |                       |                  | Centre Hosp. Universitaire de Montreal | Canada                                   | Coordinator                                             |                                                                                            |
| Emilie                            | Sau            |                       |                  | Centre Hosp. Universitaire de Montreal | Canada                                   | Researcher                                              |                                                                                            |
| Michael                           | Goldfarb       |                       |                  | Jewish General Hospital                | Canada                                   | Principal Investigator                                  |                                                                                            |
| Geraldine                         | Ricafort       |                       |                  | Jewish General Hospital                | Canada                                   | Coordinator                                             |                                                                                            |

Supplemental Online Content: Nonauthor Collaborators

\*Indicates required information. Only first name, last name, and suffix will appear in PubMed.

| *First Name and Middle Initial(s) | *Last Name    | *Suffix (eg, Jr, III) | Academic Degrees | Institution                                                                                        | Location (city, state/province, country) | Role or Contribution, eg, chair, principal investigator | Group (if more than 1 Group listed in the byline) and/or Subgroup (eg, Steering Committee) |
|-----------------------------------|---------------|-----------------------|------------------|----------------------------------------------------------------------------------------------------|------------------------------------------|---------------------------------------------------------|--------------------------------------------------------------------------------------------|
| Claudine                          | Robert        |                       |                  | Jewish General Hospital                                                                            | Canada                                   | Researcher                                              |                                                                                            |
| Sophie                            | Florencio     |                       |                  | Jewish General Hospital                                                                            | Canada                                   | Researcher                                              |                                                                                            |
| Christopher                       | Fordyce       |                       |                  | Vancouver General Hospital                                                                         | Canada                                   | Principal Investigator                                  |                                                                                            |
| Jackie                            | Chow          |                       |                  | Vancouver General Hospital                                                                         | Canada                                   | Coordinator                                             |                                                                                            |
| Reilly                            | Ische         |                       |                  | Vancouver General Hospital                                                                         | Canada                                   | Coordinator                                             |                                                                                            |
| Ngaire                            | Meadows       |                       |                  | Vancouver General Hospital                                                                         | Canada                                   | Researcher                                              |                                                                                            |
| Andrew                            | Starovoytov   |                       |                  | Vancouver General Hospital                                                                         | Canada                                   | Coordinator                                             |                                                                                            |
| Sydney                            | Thorsteinsson |                       |                  | Vancouver General Hospital                                                                         | Canada                                   | Researcher                                              |                                                                                            |
| Naomi                             | Uchida        |                       |                  | Vancouver General Hospital                                                                         | Canada                                   | Researcher                                              |                                                                                            |
| Lily                              | Cai           |                       |                  | Vancouver General Hospital                                                                         | Canada                                   | Coordinator                                             |                                                                                            |
| Shirley                           | Lim           |                       |                  | Vancouver General Hospital                                                                         | Canada                                   | Researcher                                              |                                                                                            |
| Jenny                             | Petterson     |                       |                  | Vancouver General Hospital                                                                         | Canada                                   | Coordinator                                             |                                                                                            |
| Himantha                          | De Silva      |                       |                  | Vancouver General Hospital                                                                         | Canada                                   | Coordinator                                             |                                                                                            |
| Stella                            | Chan          |                       |                  | Vancouver General Hospital                                                                         | Canada                                   | Coordinator                                             |                                                                                            |
| Celine                            | Yan           |                       |                  | Vancouver General Hospital                                                                         | Canada                                   | Coordinator                                             |                                                                                            |
| Ying Tung                         | Sia           |                       |                  | Centre integre universitaire de sante et de services sociaux de la Mauricie-et-du-Centre-du-Quebec | Canada                                   | Principal Investigator                                  |                                                                                            |
| Miguel                            | Barrero       |                       |                  | Centre integre universitaire de sante et de services sociaux de la Mauricie-et-du-Centre-du-Quebec | Canada                                   | Co-Investigator                                         |                                                                                            |
| Ricardo                           | Costa         |                       |                  | Centre integre universitaire de sante et de services sociaux de la Mauricie-et-du-Centre-du-Quebec | Canada                                   | Co-Investigator                                         |                                                                                            |

Supplemental Online Content: Nonauthor Collaborators

\*Indicates required information. Only first name, last name, and suffix will appear in PubMed.

| *First Name and Middle Initial(s) | *Last Name   | *Suffix (eg, Jr, III) | Academic Degrees | Institution                                                                                        | Location (city, state/province, country) | Role or Contribution, eg, chair, principal investigator | Group (if more than 1 Group listed in the byline) and/or Subgroup (eg, Steering Committee) |
|-----------------------------------|--------------|-----------------------|------------------|----------------------------------------------------------------------------------------------------|------------------------------------------|---------------------------------------------------------|--------------------------------------------------------------------------------------------|
| Ariel                             | Diaz         |                       |                  | Centre integre universitaire de sante et de services sociaux de la Mauricie-et-du-Centre-du-Quebec | Canada                                   | Co-Investigator                                         |                                                                                            |
| Martin                            | Faucher      |                       |                  | Centre integre universitaire de sante et de services sociaux de la Mauricie-et-du-Centre-du-Quebec | Canada                                   | Researcher                                              |                                                                                            |
| Carl-Éric                         | Gagné        |                       |                  | Centre integre universitaire de sante et de services sociaux de la Mauricie-et-du-Centre-du-Quebec | Canada                                   | Co-Investigator                                         |                                                                                            |
| Jean-François                     | Naud         |                       |                  | Centre integre universitaire de sante et de services sociaux de la Mauricie-et-du-Centre-du-Quebec | Canada                                   | Co-Investigator                                         |                                                                                            |
| Philippe                          | Rheault      |                       |                  | Centre integre universitaire de sante et de services sociaux de la Mauricie-et-du-Centre-du-Quebec | Canada                                   | Co-Investigator                                         |                                                                                            |
| Yanek                             | Pépin-Dubois |                       |                  | Centre integre universitaire de sante et de services sociaux de la Mauricie-et-du-Centre-du-Quebec | Canada                                   | Researcher                                              |                                                                                            |
| Vincent                           | Spagnoli     |                       |                  | Centre integre universitaire de sante et de services sociaux de la Mauricie-et-du-Centre-du-Quebec | Canada                                   | Researcher                                              |                                                                                            |

Supplemental Online Content: Nonauthor Collaborators

\*Indicates required information. Only first name, last name, and suffix will appear in PubMed.

| *First Name and Middle Initial(s) | *Last Name | *Suffix (eg, Jr, III) | Academic Degrees | Institution                                                                                        | Location (city, state/province, country) | Role or Contribution, eg, chair, principal investigator | Group (if more than 1 Group listed in the byline) and/or Subgroup (eg, Steering Committee) |
|-----------------------------------|------------|-----------------------|------------------|----------------------------------------------------------------------------------------------------|------------------------------------------|---------------------------------------------------------|--------------------------------------------------------------------------------------------|
| Isabelle                          | Roy        |                       |                  | Centre integre universitaire de sante et de services sociaux de la Mauricie-et-du-Centre-du-Quebec | Canada                                   | Coordinator                                             |                                                                                            |
| Benoit                            | Daneault   |                       |                  | Centre Hospitalier Sherbrooke                                                                      | Canada                                   | Principal Investigator                                  |                                                                                            |
| Julie                             | Caron      |                       |                  | Centre Hospitalier Sherbrooke                                                                      | Canada                                   | Coordinator                                             |                                                                                            |
| Mina                              | Madan      |                       |                  | Sunnybrook Health Sciences Centre                                                                  | Canada                                   | Principal Investigator                                  |                                                                                            |
| Sara                              | Jabeen     |                       |                  | Sunnybrook Health Sciences Centre                                                                  | Canada                                   | Coordinator                                             |                                                                                            |
| Nidhya Lakshmi                    | Thulasiraj |                       |                  | Sunnybrook Health Sciences Centre                                                                  | Canada                                   | Researcher                                              |                                                                                            |
| Norberto                          | Garcia     |                       |                  | Sunnybrook Health Sciences Centre                                                                  | Canada                                   | Coordinator                                             |                                                                                            |
| Suneet                            | Khurana    |                       |                  | Sunnybrook Health Sciences Centre                                                                  | Canada                                   | Coordinator                                             |                                                                                            |
| Terry                             | McPherson  |                       |                  | London Health Sciences Centre - Victoria Hospital - LHSC , University Hospital                     | Canada                                   | Principal Investigator                                  |                                                                                            |
| Rehana                            | Bajwa      |                       |                  | London Health Sciences Centre - Victoria Hospital - LHSC , University Hospital                     | Canada                                   | Researcher                                              |                                                                                            |
| Cassie                            | Wagner     |                       |                  | London Health Sciences Centre - Victoria Hospital - LHSC , University Hospital                     | Canada                                   | Coordinator                                             |                                                                                            |
| John                              | Ducas      |                       |                  | St. Boniface General Hospital                                                                      | Canada                                   | Principal Investigator                                  |                                                                                            |
| Kunal                             | Minhas     |                       |                  | St. Boniface General Hospital                                                                      | Canada                                   | Principal Investigator                                  |                                                                                            |
| Kiran                             | Atwal      |                       |                  | St. Boniface General Hospital                                                                      | Canada                                   | Coordinator                                             |                                                                                            |

## Supplemental Online Content: Nonauthor Collaborators

\*Indicates required information. Only first name, last name, and suffix will appear in PubMed.

| *First Name and Middle Initial(s) | *Last Name | *Suffix (eg, Jr, III) | Academic Degrees | Institution                   | Location (city, state/province, country) | Role or Contribution, eg, chair, principal investigator | Group (if more than 1 Group listed in the byline) and/or Subgroup (eg, Steering Committee) |
|-----------------------------------|------------|-----------------------|------------------|-------------------------------|------------------------------------------|---------------------------------------------------------|--------------------------------------------------------------------------------------------|
| Malek                             | Kass       |                       |                  | St. Boniface General Hospital | Canada                                   | Co-Investigator                                         |                                                                                            |
| Stephen Allan                     | Schaffer   |                       |                  | St. Boniface General Hospital | Canada                                   | Co-Investigator                                         |                                                                                            |
| Neil                              | Brass      |                       |                  | Royal Alexandra Hospital      | Canada                                   | Principal Investigator                                  |                                                                                            |
| Rebecca                           | Cairns     |                       |                  | Royal Alexandra Hospital      | Canada                                   | Researcher                                              |                                                                                            |
| Anna                              | Law        |                       |                  | Royal Alexandra Hospital      | Canada                                   | Researcher                                              |                                                                                            |
| Akshay                            | Bagai      |                       |                  | St. Michael's Hospital        | Canada                                   | Principal Investigator                                  |                                                                                            |
| Mona                              | Doorsian   |                       |                  | St. Michael's Hospital        | Canada                                   | Coordinator                                             |                                                                                            |
| Neil                              | Fam        |                       |                  | St. Michael's Hospital        | Canada                                   | Co-Investigator                                         |                                                                                            |
| Jan                               | Friedrich  |                       |                  | St. Michael's Hospital        | Canada                                   | Co-Investigator                                         |                                                                                            |
| Andrew                            | Baker      |                       |                  | St. Michael's Hospital        | Canada                                   | Researcher                                              |                                                                                            |
| John                              | Graham     |                       |                  | St. Michael's Hospital        | Canada                                   | Coordinator                                             |                                                                                            |
| Michael                           | Kutryk     |                       |                  | St. Michael's Hospital        | Canada                                   | Co-Investigator                                         |                                                                                            |
| Gyan                              | Sandhu     |                       |                  | St. Michael's Hospital        | Canada                                   | Coordinator                                             |                                                                                            |
| Imrana                            | Khalid     |                       |                  | St. Michael's Hospital        | Canada                                   | Coordinator                                             |                                                                                            |
| Marlene                           | Santos     |                       |                  | St. Michael's Hospital        | Canada                                   | Researcher                                              |                                                                                            |
| Simon                             | Robinson   |                       |                  | Victoria Heart Institute      | Canada                                   | Principal Investigator                                  |                                                                                            |
| Kim                               | Allen      |                       |                  | Victoria Heart Institute      | Canada                                   | Researcher                                              |                                                                                            |
| Noreen                            | Lounsbury  |                       |                  | Victoria Heart Institute      | Canada                                   | Coordinator                                             |                                                                                            |
| Sheryll                           | Sorensen   |                       |                  | Victoria Heart Institute      | Canada                                   | Coordinator                                             |                                                                                            |
| Elizabeth                         | Martin     |                       |                  | Victoria Heart Institute      | Canada                                   | Coordinator                                             |                                                                                            |
| Vladimír                          | Džavík     |                       |                  | UHN                           | Canada                                   | Principal Investigator                                  |                                                                                            |
| Anna                              | Tran       |                       |                  | UHN                           | Canada                                   | Coordinator                                             |                                                                                            |
| Razi                              | Khan       |                       |                  | Royal Columbian Hospital      | Canada                                   | Principal Investigator                                  |                                                                                            |
| Nicolas                           | Michaud    |                       |                  | Hotel Dieu de Levis           | Canada                                   | Principal Investigator                                  |                                                                                            |

## Supplemental Online Content: Nonauthor Collaborators

\*Indicates required information. Only first name, last name, and suffix will appear in PubMed.

| *First Name and Middle Initial(s) | *Last Name     | *Suffix (eg, Jr, III) | Academic Degrees | Institution                                                  | Location (city, state/province, country) | Role or Contribution, eg, chair, principal investigator | Group (if more than 1 Group listed in the byline) and/or Subgroup (eg, Steering Committee) |
|-----------------------------------|----------------|-----------------------|------------------|--------------------------------------------------------------|------------------------------------------|---------------------------------------------------------|--------------------------------------------------------------------------------------------|
| Philippe Gabriel                  | Steg           |                       |                  | Hôpital BICHAT - APHP ; Université Paris-Cité, INSERM U-1148 | France                                   | Principal Investigator                                  | Executive Committee, Steering Committee, EU Clinical Coordinating Center                   |
| Gregory                           | Ducrocq        |                       |                  | Hôpital BICHAT - APHP ; Université Paris-Cité, INSERM U-1148 | France                                   | Principal Investigator                                  | Clinical Events Committee, EU Clinical Coordinating Center                                 |
| Arthur                            | Darmon         |                       |                  | Hôpital BICHAT - APHP                                        | France                                   | Co-Investigator                                         |                                                                                            |
| Quentin                           | Fischer        |                       |                  | Hôpital BICHAT - APHP                                        | France                                   | Co-Investigator                                         |                                                                                            |
| Neila                             | Sayah          |                       |                  | Hôpital BICHAT - APHP                                        | France                                   | Co-Investigator                                         |                                                                                            |
| Hélène                            | Abergel        |                       |                  | Hôpital BICHAT - APHP                                        | France                                   | Co-Investigator                                         |                                                                                            |
| Catherine                         | Bouffard       |                       |                  | Hôpital BICHAT - APHP                                        | France                                   | Co-Investigator                                         |                                                                                            |
| Audrey                            | Cailliau       |                       |                  | Hôpital BICHAT - APHP                                        | France                                   | Co-Investigator                                         |                                                                                            |
| Axelle                            | Fuentes        |                       |                  | Hôpital BICHAT - APHP                                        | France                                   | Co-Investigator                                         |                                                                                            |
| Nicolas                           | Pham           |                       |                  | Hôpital BICHAT - APHP                                        | France                                   | Researcher                                              |                                                                                            |
| Alexandre                         | Gautier        |                       |                  | Hôpital BICHAT - APHP                                        | France                                   | Researcher                                              |                                                                                            |
| Jules                             | Mesnier        |                       |                  | Hôpital BICHAT - APHP                                        | France                                   | Researcher                                              |                                                                                            |
| Etienne                           | Puymirat       |                       |                  | HEGP - APHP                                                  | France                                   | Principal Investigator                                  |                                                                                            |
| Mélissa                           | Sriwaran       |                       |                  | HEGP - APHP                                                  | France                                   | Researcher                                              |                                                                                            |
| Rachel                            | Elysee         |                       |                  | HEGP - APHP                                                  | France                                   | Co-Investigator                                         |                                                                                            |
| Antoine                           | Fayol          |                       |                  | HEGP - APHP                                                  | France                                   | Co-Investigator                                         |                                                                                            |
| Amandine                          | Grelier        |                       |                  | HEGP - APHP                                                  | France                                   | Co-Investigator                                         |                                                                                            |
| Nesrine                           | Hafsi          |                       |                  | HEGP - APHP                                                  | France                                   | Co-Investigator                                         |                                                                                            |
| Hasina                            | Rakotosamimana |                       |                  | HEGP - APHP                                                  | France                                   | Co-Investigator                                         |                                                                                            |
| Victoria                          | Tea            |                       |                  | HEGP - APHP                                                  | France                                   | Co-Investigator                                         |                                                                                            |
| Sarah                             | Arab           |                       |                  | HEGP - APHP                                                  | France                                   | Researcher                                              |                                                                                            |
| Hinde                             | Irekti         |                       |                  | HEGP - APHP                                                  | France                                   | Researcher                                              |                                                                                            |
| Gilles                            | Lemesle        |                       |                  | CHRU Lille                                                   | France                                   | Principal Investigator                                  |                                                                                            |

## Supplemental Online Content: Nonauthor Collaborators

\*Indicates required information. Only first name, last name, and suffix will appear in PubMed.

| *First Name and Middle Initial(s) | *Last Name      | *Suffix (eg, Jr, III) | Academic Degrees | Institution                      | Location (city, state/province, country) | Role or Contribution, eg, chair, principal investigator | Group (if more than 1 Group listed in the byline) and/or Subgroup (eg, Steering Committee) |
|-----------------------------------|-----------------|-----------------------|------------------|----------------------------------|------------------------------------------|---------------------------------------------------------|--------------------------------------------------------------------------------------------|
| Anne                              | Druart          |                       |                  | CHRU Lille                       | France                                   | Co-Investigator                                         |                                                                                            |
| Isabelle                          | Pilat           |                       |                  | CHRU Lille                       | France                                   | Co-Investigator                                         |                                                                                            |
| Basile                            | Verdier         |                       |                  | CHRU Lille                       | France                                   | Co-Investigator                                         |                                                                                            |
| Emile                             | Ferrari         |                       |                  | CHU Nice - Hôpital Pasteur       | France                                   | Principal Investigator                                  |                                                                                            |
| Etienne                           | Fourrier        |                       |                  | CHU Nice - Hôpital Pasteur       | France                                   | Co-Investigator                                         |                                                                                            |
| Mohamed                           | Labbaoui        |                       |                  | CHU Nice - Hôpital Pasteur       | France                                   | Co-Investigator                                         |                                                                                            |
| Nassim                            | Redjimi         |                       |                  | CHU Nice - Hôpital Pasteur       | France                                   | Co-Investigator                                         |                                                                                            |
| Amina                             | Zamiti-Smondel  |                       |                  | CHU Nice - Hôpital Pasteur       | France                                   | Co-Investigator                                         |                                                                                            |
| Rabab                             | Bencherif       |                       |                  | CHU Nice - Hôpital Pasteur       | France                                   | Researcher                                              |                                                                                            |
| Benoit                            | Lattuca         |                       |                  | CHU Caremeau - Nîmes             | France                                   | Principal Investigator                                  |                                                                                            |
| Elodie                            | Delelo          |                       |                  | CHU Caremeau - Nîmes             | France                                   | Co-Investigator                                         |                                                                                            |
| Johanne                           | Silvain         |                       |                  | Hôpital Pitié Salpêtrière - APHP | France                                   | Principal Investigator                                  |                                                                                            |
| Olivier                           | Barthelemy      |                       |                  | Hôpital Pitié Salpêtrière - APHP | France                                   | Co-Investigator                                         |                                                                                            |
| Fatima                            | Benattia        |                       |                  | Hôpital Pitié Salpêtrière - APHP | France                                   | Co-Investigator                                         |                                                                                            |
| Perrine                           | Devos           |                       |                  | Hôpital Pitié Salpêtrière - APHP | France                                   | Co-Investigator                                         |                                                                                            |
| Soraya                            | Merbah          |                       |                  | Hôpital Pitié Salpêtrière - APHP | France                                   | Co-Investigator                                         |                                                                                            |
| Juliane                           | Posson          |                       |                  | Hôpital Pitié Salpêtrière - APHP | France                                   | Co-Investigator                                         |                                                                                            |
| Nikki                             | Procopi         |                       |                  | Hôpital Pitié Salpêtrière - APHP | France                                   | Co-Investigator                                         |                                                                                            |
| Thomas                            | Wallet          |                       |                  | Hôpital Pitié Salpêtrière - APHP | France                                   | Co-Investigator                                         |                                                                                            |
| Michel                            | Zeitouni        |                       |                  | Hôpital Pitié Salpêtrière - APHP | France                                   | Co-Investigator                                         |                                                                                            |
| Arnaud                            | Ferrante        |                       |                  | Hôpital Pitié Salpêtrière - APHP | France                                   | Researcher                                              |                                                                                            |
| Camille                           | Granger         |                       |                  | Hôpital Pitié Salpêtrière - APHP | France                                   | Researcher                                              |                                                                                            |
| Stéphane                          | Manzo-Silberman |                       |                  | Hôpital Pitié Salpêtrière - APHP | France                                   | Researcher                                              |                                                                                            |
| Tomy                              | Salloum         |                       |                  | Hôpital Pitié Salpêtrière - APHP | France                                   | Researcher                                              |                                                                                            |
| Gérald                            | Vanzetto        |                       |                  | Hôpital Michalon - Grenoble      | France                                   | Principal Investigator                                  |                                                                                            |

## Supplemental Online Content: Nonauthor Collaborators

\*Indicates required information. Only first name, last name, and suffix will appear in PubMed.

| *First Name and Middle Initial(s) | *Last Name      | *Suffix (eg, Jr, III) | Academic Degrees | Institution                       | Location (city, state/province, country) | Role or Contribution, eg, chair, principal investigator | Group (if more than 1 Group listed in the byline) and/or Subgroup (eg, Steering Committee) |
|-----------------------------------|-----------------|-----------------------|------------------|-----------------------------------|------------------------------------------|---------------------------------------------------------|--------------------------------------------------------------------------------------------|
| Gilles                            | Barone Rochette |                       |                  | Hôpital Michalon - Grenoble       | France                                   | Co-Investigator                                         |                                                                                            |
| Sara                              | Blanc Vannet    |                       |                  | Hôpital Michalon - Grenoble       | France                                   | Co-Investigator                                         |                                                                                            |
| Clémence                          | Charlon         |                       |                  | Hôpital Michalon - Grenoble       | France                                   | Co-Investigator                                         |                                                                                            |
| Océane                            | Crebier         |                       |                  | Hôpital Michalon - Grenoble       | France                                   | Co-Investigator                                         |                                                                                            |
| Stéphanie                         | Marliere        |                       |                  | Hôpital Michalon - Grenoble       | France                                   | Co-Investigator                                         |                                                                                            |
| Pauline                           | Peretout        |                       |                  | Hôpital Michalon - Grenoble       | France                                   | Co-Investigator                                         |                                                                                            |
| Julie                             | Hildt           |                       |                  | Hôpital Michalon - Grenoble       | France                                   | Researcher                                              |                                                                                            |
| Laura                             | Cetran          |                       |                  | Hôpital Haut Lévêque - Pessac     | France                                   | Principal Investigator                                  |                                                                                            |
| Thomas                            | Baudinet        |                       |                  | Hôpital Haut Lévêque - Pessac     | France                                   | Co-Investigator                                         |                                                                                            |
| Pierre                            | Coste           |                       |                  | Hôpital Haut Lévêque - Pessac     | France                                   | Co-Investigator                                         |                                                                                            |
| Amandine                          | Ruissel         |                       |                  | Hôpital Haut Lévêque - Pessac     | France                                   | Co-Investigator                                         |                                                                                            |
| Marine                            | Servat          |                       |                  | Hôpital Haut Lévêque - Pessac     | France                                   | Researcher                                              |                                                                                            |
| Thibault                          | Lhermusier      |                       |                  | CHU Rangueil - Toulouse           | France                                   | Principal Investigator                                  |                                                                                            |
| Frédéric                          | Bouisset        |                       |                  | CHU Rangueil - Toulouse           | France                                   | Co-Investigator                                         |                                                                                            |
| Francisco                         | Campelo-Parada  |                       |                  | CHU Rangueil - Toulouse           | France                                   | Co-Investigator                                         |                                                                                            |
| Kimberly                          | Lemoine         |                       |                  | CHU Rangueil - Toulouse           | France                                   | Co-Investigator                                         |                                                                                            |
| Mouin                             | Nasr            |                       |                  | CHU Rangueil - Toulouse           | France                                   | Co-Investigator                                         |                                                                                            |
| Marine                            | Poisay          |                       |                  | CHU Rangueil - Toulouse           | France                                   | Co-Investigator                                         |                                                                                            |
| Clément                           | Servoz          |                       |                  | CHU Rangueil - Toulouse           | France                                   | Co-Investigator                                         |                                                                                            |
| Stéphanie                         | Tribeau         |                       |                  | CHU Rangueil - Toulouse           | France                                   | Co-Investigator                                         |                                                                                            |
| Yves                              | Cottin          |                       |                  | CHU le Bocage - Dijon             | France                                   | Principal Investigator                                  |                                                                                            |
| Florence                          | Bichat          |                       |                  | CHU le Bocage - Dijon             | France                                   | Coordinator                                             |                                                                                            |
| Mailis                            | Saint-Jalmes    |                       |                  | CHU le Bocage - Dijon             | France                                   | Co-Investigator                                         |                                                                                            |
| Victor                            | Buzura          |                       |                  | Centre Hospitalier sud francilien | France                                   | Principal Investigator                                  |                                                                                            |



## Supplemental Online Content: Nonauthor Collaborators

\*Indicates required information. Only first name, last name, and suffix will appear in PubMed.

| *First Name and Middle Initial(s) | *Last Name   | *Suffix (eg, Jr, III) | Academic Degrees | Institution                       | Location (city, state/province, country) | Role or Contribution, eg, chair, principal investigator | Group (if more than 1 Group listed in the byline) and/or Subgroup (eg, Steering Committee) |
|-----------------------------------|--------------|-----------------------|------------------|-----------------------------------|------------------------------------------|---------------------------------------------------------|--------------------------------------------------------------------------------------------|
| Yann                              | Rosamel      |                       |                  | Centre Hospitalier sud francilien | France                                   | Principal Investigator                                  |                                                                                            |
| Sarah                             | Hadjih       |                       |                  | Centre Hospitalier sud francilien | France                                   | Co-Investigator                                         |                                                                                            |
| Denis                             | Angoulvant   |                       |                  | CHRU Tours - Hôpital Trousseau    | France                                   | Principal Investigator                                  |                                                                                            |
| Emilie                            | Collet       |                       |                  | CHRU Tours - Hôpital Trousseau    | France                                   | Co-Investigator                                         |                                                                                            |
| Fabrice                           | Ivanès       |                       |                  | CHRU Tours - Hôpital Trousseau    | France                                   | Co-Investigator                                         |                                                                                            |
| Katia                             | Lassouani    |                       |                  | CHRU Tours - Hôpital Trousseau    | France                                   | Co-Investigator                                         |                                                                                            |
| Mohammed                          | Mouzouri     |                       |                  | CHRU Tours - Hôpital Trousseau    | France                                   | Co-Investigator                                         |                                                                                            |
| Djedjiga                          | Naudin       |                       |                  | CHRU Tours - Hôpital Trousseau    | France                                   | Co-Investigator                                         |                                                                                            |
| Thibaud                           | Genet        |                       |                  | CHRU Tours - Hôpital Trousseau    | France                                   | Researcher                                              |                                                                                            |
| Jean Guillaume                    | Dillinger    |                       |                  | Hôpital Lariboisière - APHP       | France                                   | Principal Investigator                                  |                                                                                            |
| Nadhira                           | Bennacer     |                       |                  | Hôpital Lariboisière - APHP       | France                                   | Co-Investigator                                         |                                                                                            |
| Lea                               | Cacoub       |                       |                  | Hôpital Lariboisière - APHP       | France                                   | Co-Investigator                                         |                                                                                            |
| Antoine                           | Lequipar     |                       |                  | Hôpital Lariboisière - APHP       | France                                   | Co-Investigator                                         |                                                                                            |
| Baya                              | Mahtout      |                       |                  | Hôpital Lariboisière - APHP       | France                                   | Co-Investigator                                         |                                                                                            |
| Christophe                        | Thuairé      |                       |                  | CH Louis Pasteur, Chartres        | France                                   | Principal Investigator                                  |                                                                                            |
| Marina                            | Leniliot     |                       |                  | CH Louis Pasteur, Chartres        | France                                   | Researcher                                              |                                                                                            |
| Emilie                            | Tachot       |                       |                  | CH Louis Pasteur, Chartres        | France                                   | Co-Investigator                                         |                                                                                            |
| Corine                            | Thobois      |                       |                  | CH Louis Pasteur, Chartres        | France                                   | Co-Investigator                                         |                                                                                            |
| Christel                          | Vassaliere   |                       |                  | CH Louis Pasteur, Chartres        | France                                   | Researcher                                              |                                                                                            |
| Batric                            | Popovic      |                       |                  | CHU Nancy                         | France                                   | Principal Investigator                                  |                                                                                            |
| Jessica                           | Breistroff   |                       |                  | CHU Nancy                         | France                                   | Co-Investigator                                         |                                                                                            |
| Aurelie                           | Gutehrle     |                       |                  | CHU Nancy                         | France                                   | Co-Investigator                                         |                                                                                            |
| Maximilien                        | Saint-Gilles |                       |                  | CHU Nancy                         | France                                   | Co-Investigator                                         |                                                                                            |
| Jeanne                            | Varlot       |                       |                  | CHU Nancy                         | France                                   | Co-Investigator                                         |                                                                                            |

## Supplemental Online Content: Nonauthor Collaborators

\*Indicates required information. Only first name, last name, and suffix will appear in PubMed.

| *First Name and Middle Initial(s) | *Last Name               | *Suffix (eg, Jr, III) | Academic Degrees | Institution                            | Location (city, state/province, country) | Role or Contribution, eg, chair, principal investigator | Group (if more than 1 Group listed in the byline) and/or Subgroup (eg, Steering Committee) |
|-----------------------------------|--------------------------|-----------------------|------------------|----------------------------------------|------------------------------------------|---------------------------------------------------------|--------------------------------------------------------------------------------------------|
| Eric                              | Durand                   |                       |                  | CHU de Rouen                           | France                                   | Principal Investigator                                  |                                                                                            |
| Delphine                          | Beziau-Gasnier           |                       |                  | CHU de Rouen                           | France                                   | Coordinator                                             |                                                                                            |
| Najime                            | Bouhzam                  |                       |                  | CHU de Rouen                           | France                                   | Co-Investigator                                         |                                                                                            |
| Solenn                            | Catherine                |                       |                  | CHU de Rouen                           | France                                   | Co-Investigator                                         |                                                                                            |
| Bryan                             | Marais                   |                       |                  | CHU de Rouen                           | France                                   | Co-Investigator                                         |                                                                                            |
| Christophe                        | Tron                     |                       |                  | CHU de Rouen                           | France                                   | Co-Investigator                                         |                                                                                            |
| Claire                            | Veziar                   |                       |                  | CHU de Rouen                           | France                                   | Co-Investigator                                         |                                                                                            |
| Thibaut                           | Hemery                   |                       |                  | CHU de Rouen                           | France                                   | Researcher                                              |                                                                                            |
| Claire                            | Bouleti                  |                       |                  | CHU Poitiers                           | France                                   | Principal Investigator                                  |                                                                                            |
| Arthur                            | Ramonatxo                |                       |                  | CHU Poitiers                           | France                                   | Co-Investigator                                         |                                                                                            |
| Sonia                             | Azzakani                 |                       |                  | CHU Poitiers                           | France                                   | Co-Investigator                                         |                                                                                            |
| Nathalie                          | Berger                   |                       |                  | CHU Poitiers                           | France                                   | Co-Investigator                                         |                                                                                            |
| Celine                            | Boucher                  |                       |                  | CHU Poitiers                           | France                                   | Co-Investigator                                         |                                                                                            |
| François                          | Roubille                 |                       |                  | CHU Arnaud de Villeneuve - Montpellier | France                                   | Principal Investigator                                  |                                                                                            |
| Chloé                             | Bonneton                 |                       |                  | CHU Arnaud de Villeneuve - Montpellier | France                                   | Researcher                                              |                                                                                            |
| Gautier                           | Desmoulin                |                       |                  | CHU Arnaud de Villeneuve - Montpellier | France                                   | Researcher                                              |                                                                                            |
| Fabien                            | Huet                     |                       |                  | CHU Arnaud de Villeneuve - Montpellier | France                                   | Researcher                                              |                                                                                            |
| Sandra                            | Kahlouche                |                       |                  | CHU Arnaud de Villeneuve - Montpellier | France                                   | Coordinator                                             |                                                                                            |
| Laurent                           | Delorme                  |                       |                  | Clinique du Pont de Chaume - Montauban | France                                   | Principal Investigator                                  |                                                                                            |
| Angélique                         | Andrieu                  |                       |                  | Clinique du Pont de Chaume - Montauban | France                                   | Co-Investigator                                         |                                                                                            |
| Javier                            | Molina-Martin De Nicolas |                       |                  | Clinique du Pont de Chaume - Montauban | France                                   | Co-Investigator                                         |                                                                                            |

Supplemental Online Content: Nonauthor Collaborators

\*Indicates required information. Only first name, last name, and suffix will appear in PubMed.

| *First Name and Middle Initial(s) | *Last Name  | *Suffix (eg, Jr, III) | Academic Degrees | Institution                            | Location (city, state/province, country) | Role or Contribution, eg, chair, principal investigator | Group (if more than 1 Group listed in the byline) and/or Subgroup (eg, Steering Committee) |
|-----------------------------------|-------------|-----------------------|------------------|----------------------------------------|------------------------------------------|---------------------------------------------------------|--------------------------------------------------------------------------------------------|
| Nathalie                          | Durand      |                       |                  | Clinique du Pont de Chaume - Montauban | France                                   | Researcher                                              |                                                                                            |
| Marion                            | Berous      |                       |                  | Clinique du Pont de Chaume - Montauban | France                                   | Researcher                                              |                                                                                            |
| Romain                            | André       |                       |                  | Clinique du Pont de Chaume - Montauban | France                                   | Researcher                                              |                                                                                            |
| Ian                               | Crozier     |                       |                  | Christchurch Hospital                  | New Zealand                              | Principal Investigator                                  |                                                                                            |
| John                              | Elliott     |                       |                  | Christchurch Hospital                  | New Zealand                              | Principal Investigator                                  |                                                                                            |
| Catherine                         | Cruickshank |                       |                  | Christchurch Hospital                  | New Zealand                              | Coordinator                                             |                                                                                            |
| Houda                             | El Banna    |                       |                  | Christchurch Hospital                  | New Zealand                              | Researcher                                              |                                                                                            |
| Michael                           | Hume        |                       |                  | Christchurch Hospital                  | New Zealand                              | Researcher                                              |                                                                                            |
| Jocelyne                          | Benatar     |                       |                  | Auckland Hospital                      | New Zealand                              | Principal Investigator                                  |                                                                                            |
| Jithendra                         | Somararatne |                       |                  | Auckland Hospital                      | New Zealand                              | Researcher                                              |                                                                                            |
| Diana                             | Gatland     |                       |                  | Auckland Hospital                      | New Zealand                              | Researcher                                              |                                                                                            |
| Danica                            | Kistanna    |                       |                  | Auckland Hospital                      | New Zealand                              | Coordinator                                             |                                                                                            |
| Cathrine                          | Patten      |                       |                  | Auckland Hospital                      | New Zealand                              | Researcher                                              |                                                                                            |
| Doreen                            | Singh       |                       |                  | Auckland Hospital                      | New Zealand                              | Researcher                                              |                                                                                            |
| Samraj                            | Nandra      |                       |                  | Whangarei Hospital                     | New Zealand                              | Principal Investigator                                  |                                                                                            |
| Chuen Siang                       | Low         |                       |                  | Whangarei Hospital                     | New Zealand                              | Co-Investigator                                         |                                                                                            |
| Susan                             | Vallancey   |                       |                  | Whangarei Hospital                     | New Zealand                              | Researcher                                              |                                                                                            |
| Ian                               | Ternouth    |                       |                  | Taranaki Hospital                      | New Zealand                              | Principal Investigator                                  |                                                                                            |
| Neelam                            | Dalman      |                       |                  | Taranaki Hospital                      | New Zealand                              | Co-Investigator                                         |                                                                                            |
| Aleisha                           | Easton      |                       |                  | Taranaki Hospital                      | New Zealand                              | Co-Investigator                                         |                                                                                            |
| Carolyn                           | Jackson     |                       |                  | Taranaki Hospital                      | New Zealand                              | Researcher                                              |                                                                                            |
| Simon                             | Kirkham     |                       |                  | Taranaki Hospital                      | New Zealand                              | Researcher                                              |                                                                                            |
| Cathy                             | Vickers     |                       |                  | Taranaki Hospital                      | New Zealand                              | Researcher                                              |                                                                                            |

## Supplemental Online Content: Nonauthor Collaborators

\*Indicates required information. Only first name, last name, and suffix will appear in PubMed.

| *First Name and Middle Initial(s) | *Last Name | *Suffix (eg, Jr, III) | Academic Degrees | Institution                                       | Location (city, state/province, country) | Role or Contribution, eg, chair, principal investigator | Group (if more than 1 Group listed in the byline) and/or Subgroup (eg, Steering Committee) |
|-----------------------------------|------------|-----------------------|------------------|---------------------------------------------------|------------------------------------------|---------------------------------------------------------|--------------------------------------------------------------------------------------------|
| Nick                              | Fisher     |                       |                  | Nelson Hospital                                   | New Zealand                              | Principal Investigator                                  |                                                                                            |
| Jette                             | Koelle     |                       |                  | Nelson Hospital                                   | New Zealand                              | Researcher                                              |                                                                                            |
| Charlotte                         | McNab      |                       |                  | Nelson Hospital                                   | New Zealand                              | Researcher                                              |                                                                                            |
| David                             | Brieger    |                       |                  | Concord Repatriation General Hospital             | Australia                                | Principal Investigator                                  |                                                                                            |
| Shahab                            | Pathan     |                       |                  | Concord Repatriation General Hospital             | Australia                                | Researcher                                              |                                                                                            |
| Imants                            | Rubenis    |                       |                  | Concord Repatriation General Hospital             | Australia                                | Researcher                                              |                                                                                            |
| Su                                | Swe        |                       |                  | Concord Repatriation General Hospital             | Australia                                | Researcher                                              |                                                                                            |
| Sohaib                            | Virk       |                       |                  | Concord Repatriation General Hospital             | Australia                                | Researcher                                              |                                                                                            |
| Graham                            | Hillis     |                       |                  | Royal Perth Hospital                              | Australia                                | Principal Investigator                                  |                                                                                            |
| Michelle                          | Bonner     |                       |                  | Royal Perth Hospital                              | Australia                                | Researcher                                              |                                                                                            |
| Charmaine                         | Dias       |                       |                  | Royal Perth Hospital                              | Australia                                | Researcher                                              |                                                                                            |
| Lorraine                          | Hillis     |                       |                  | Royal Perth Hospital                              | Australia                                | Researcher                                              |                                                                                            |
| Maria Mori                        | Brooks     |                       |                  | University of Pittsburgh                          | United States                            | Principal Investigator                                  | Executive Committee, Steering Committee, and Data Coordinating Center                      |
| John H.                           | Alexander  |                       |                  | Duke Clinical Research Institute, Duke University | United States                            | Executive Committee                                     | Executive Committee and Steering Committee                                                 |
| Shaun G.                          | Goodman    |                       |                  | St. Michael's Hospital, University of Toronto     | Canada                                   | Executive Committee                                     | Executive Committee and Steering Committee                                                 |

## Supplemental Online Content: Nonauthor Collaborators

\*Indicates required information. Only first name, last name, and suffix will appear in PubMed.

| *First Name and Middle Initial(s) | *Last Name | *Suffix (eg, Jr, III) | Academic Degrees | Institution                                                                       | Location (city, state/province, country) | Role or Contribution, eg, chair, principal investigator | Group (if more than 1 Group listed in the byline) and/or Subgroup (eg, Steering Committee)                 |
|-----------------------------------|------------|-----------------------|------------------|-----------------------------------------------------------------------------------|------------------------------------------|---------------------------------------------------------|------------------------------------------------------------------------------------------------------------|
| Paul C.                           | Hébert     |                       |                  | Centre de recherche du Centre hospitalier de l'Université de Montréal             | Canada                                   | Principal Investigator                                  | Executive Committee, Steering Committee, and Canadian Coordinating Center                                  |
| Renato D.                         | Lopes      |                       |                  | Brazilian Clinical Research Institute (BCRI) and Duke Clinical Research Institute | Brazil                                   | Principal Investigator                                  | Executive Committee, Steering Committee, Clinical Events Committee, Brazilian Clinical Coordinating Center |
| Tabassome                         | Simon      |                       |                  | Hopital St Antoine; Sorbonne Université, INSERM U-1148                            | France                                   | Principal Investigator                                  | Executive Committee, Steering Committee, EU Clinical Coordinating Center                                   |
| Harvey                            | White      |                       |                  | Green Lane Coordinating Centre Ltd                                                | New Zealand                              | Principal Investigator                                  | New Zealand Coordinating Center, Executive Committee, Steering Committee                                   |
| Caroline                          | Alsweiler  |                       |                  | Green Lane Coordinating Centre Ltd                                                | New Zealand                              | Coordinator                                             | New Zealand Coordinating Center and Steering Committee                                                     |
| Bernard R.                        | Chaitman   |                       |                  | St Louis University                                                               | United States                            | Principal Investigator                                  | Clinical Events Committee Chair, Steering Committee                                                        |
| Dean A.                           | Fergusson  |                       |                  | Ottawa Hospital Research Institute                                                | Canada                                   | Steering Committee                                      | Steering Committee                                                                                         |
| Erin                              | Morton     |                       |                  | Finders University                                                                | Australia                                | Coordinator                                             | Australian Coordinating Center and Steering Committee                                                      |

## Supplemental Online Content: Nonauthor Collaborators

\*Indicates required information. Only first name, last name, and suffix will appear in PubMed.

| *First Name and Middle Initial(s) | *Last Name               | *Suffix (eg, Jr, III) | Academic Degrees | Institution                                                                  | Location (city, state/province, country) | Role or Contribution, eg, chair, principal investigator | Group (if more than 1 Group listed in the byline) and/or Subgroup (eg, Steering Committee) |
|-----------------------------------|--------------------------|-----------------------|------------------|------------------------------------------------------------------------------|------------------------------------------|---------------------------------------------------------|--------------------------------------------------------------------------------------------|
| Darrell J.                        | Triulzi                  |                       |                  | University of Pittsburgh                                                     | United States                            | Steering Committee                                      | Steering Committee                                                                         |
| Lilian Mazza                      | Barbosa                  |                       |                  | Brazilian Clinical Research Institute (BCRI)                                 | Brazil                                   | Researcher                                              | Brazil: Brazilian Clinical Research Institute                                              |
| Pedro Gabriel Melo                | de Barros e Silva        |                       |                  | Brazilian Clinical Research Institute (BCRI)                                 | Brazil                                   | Researcher                                              | Brazilian Clinical Coordinating Center and Clinical Events Committee                       |
| Liliane A T                       | Arnaldi Seixas           |                       |                  | Brazilian Clinical Research Institute (BCRI)                                 | Brazil                                   | Researcher                                              | Brazil: Brazilian Clinical Research Institute                                              |
| Paola E.                          | Arantes                  |                       |                  | Brazilian Clinical Research Institute (BCRI)                                 | Brazil                                   | Researcher                                              | Brazil: Brazilian Clinical Research Institute                                              |
| Larissa                           | Teixeira Aleixo Silva    |                       |                  | Brazilian Clinical Research Institute (BCRI)                                 | Brazil                                   | Data Management                                         | Brazil: Brazilian Clinical Research Institute                                              |
| Georgia                           | Beatriz Oliveira Damásio |                       |                  | Brazilian Clinical Research Institute (BCRI)                                 | Brazil                                   | Researcher                                              | Brazil: Brazilian Clinical Research Institute                                              |
| Laurence                          | Berard                   |                       |                  | APHP, Plateforme de Recherche Clinique de l'Est Parisien (URCEST-CRCEST-CRB) | France                                   | Coordinator                                             | EU Clinical Coordinating center                                                            |
| Alexandra                         | Rousseau                 |                       |                  | APHP, Plateforme de Recherche Clinique de l'Est Parisien (URCEST-CRCEST-CRB) | France                                   | Data Management                                         | EU Clinical Coordinating center                                                            |
| Sandra                            | Paco                     |                       |                  | APHP, Plateforme de Recherche Clinique de l'Est Parisien (URCEST-CRCEST-CRB) | France                                   | Project Manager                                         | EU Clinical Coordinating center                                                            |
| Narimane                          | Benhamadi                |                       |                  | APHP, Plateforme de Recherche Clinique de l'Est Parisien (URCEST-CRCEST-CRB) | France                                   | Researcher                                              | EU Clinical Coordinating center                                                            |

## Supplemental Online Content: Nonauthor Collaborators

\*Indicates required information. Only first name, last name, and suffix will appear in PubMed.

| *First Name and Middle Initial(s) | *Last Name   | *Suffix (eg, Jr, III) | Academic Degrees | Institution                                                                  | Location (city, state/province, country) | Role or Contribution, eg, chair, principal investigator | Group (if more than 1 Group listed in the byline) and/or Subgroup (eg, Steering Committee) |
|-----------------------------------|--------------|-----------------------|------------------|------------------------------------------------------------------------------|------------------------------------------|---------------------------------------------------------|--------------------------------------------------------------------------------------------|
| Véléda                            | Blesboi      |                       |                  | APHP, Plateforme de Recherche Clinique de l'Est Parisien (URCEST-CRCEST-CRB) | France                                   | Researcher                                              | EU Clinical Coordinating center                                                            |
| Marie                             | Delon        |                       |                  | APHP, Plateforme de Recherche Clinique de l'Est Parisien (URCEST-CRCEST-CRB) | France                                   | Researcher                                              | EU Clinical Coordinating center                                                            |
| Alexia                            | Ep           |                       |                  | APHP, Plateforme de Recherche Clinique de l'Est Parisien (URCEST-CRCEST-CRB) | France                                   | Researcher                                              | EU Clinical Coordinating center                                                            |
| Kaïna                             | Mahmoudi     |                       |                  | APHP, Plateforme de Recherche Clinique de l'Est Parisien (URCEST-CRCEST-CRB) | France                                   | Researcher                                              | EU Clinical Coordinating center                                                            |
| Katia                             | Ledra        |                       |                  | APHP, Plateforme de Recherche Clinique de l'Est Parisien (URCEST-CRCEST-CRB) | France                                   | Researcher                                              | EU Clinical Coordinating center                                                            |
| Irène                             | Garcia Ramos |                       |                  | APHP, Plateforme de Recherche Clinique de l'Est Parisien (URCEST-CRCEST-CRB) | France                                   | Researcher                                              | EU Clinical Coordinating center                                                            |
| Marie                             | Henault      |                       |                  | APHP, Plateforme de Recherche Clinique de l'Est Parisien (URCEST-CRCEST-CRB) | France                                   | Researcher                                              | EU Clinical Coordinating center                                                            |
| Alexia                            | Dantigny     |                       |                  | APHP, Plateforme de Recherche Clinique de l'Est Parisien (URCEST-CRCEST-CRB) | France                                   | Researcher                                              | EU Clinical Coordinating center                                                            |
| Aichetou                          | Kone         |                       |                  | APHP, Plateforme de Recherche Clinique de l'Est Parisien (URCEST-CRCEST-CRB) | France                                   | Researcher                                              | EU Clinical Coordinating center                                                            |
| Djouher                           | Firoud       |                       |                  | APHP, Plateforme de Recherche Clinique de l'Est Parisien (URCEST-CRCEST-CRB) | France                                   | Researcher                                              | EU Clinical Coordinating center                                                            |
| Sarah                             | Arab         |                       |                  | APHP, Plateforme de Recherche Clinique de l'Est Parisien (URCEST-CRCEST-CRB) | France                                   | Researcher                                              | EU Clinical Coordinating center                                                            |
| Federica                          | Scialo       |                       |                  | APHP, Plateforme de Recherche Clinique de l'Est Parisien (URCEST-CRCEST-CRB) | France                                   | Researcher                                              | EU Clinical Coordinating center                                                            |

## Supplemental Online Content: Nonauthor Collaborators

\*Indicates required information. Only first name, last name, and suffix will appear in PubMed.

| *First Name and Middle Initial(s) | *Last Name | *Suffix (eg, Jr, III) | Academic Degrees | Institution                                                                  | Location (city, state/province, country) | Role or Contribution, eg, chair, principal investigator | Group (if more than 1 Group listed in the byline) and/or Subgroup (eg, Steering Committee) |
|-----------------------------------|------------|-----------------------|------------------|------------------------------------------------------------------------------|------------------------------------------|---------------------------------------------------------|--------------------------------------------------------------------------------------------|
| Véronique                         | Pignot     |                       |                  | APHP, Plateforme de Recherche Clinique de l'Est Parisien (URCEST-CRCEST-CRB) | France                                   | Data Management                                         | EU Clinical Coordinating center                                                            |
| Elodie                            | Drouet     |                       |                  | APHP, Plateforme de Recherche Clinique de l'Est Parisien (URCEST-CRCEST-CRB) | France                                   | Coordinator                                             | EU Clinical Coordinating center                                                            |
| Eunice                            | Nubret     |                       |                  | APHP, DRCI                                                                   | France                                   | Project Manager                                         | EU Clinical Coordinating center                                                            |
| Margot                            | Bobin      |                       |                  | APHP, DRCI                                                                   | France                                   | Researcher                                              | EU Clinical Coordinating center                                                            |
| Christophe                        | Aucan      |                       |                  | APHP, DRCI                                                                   | France                                   | Researcher                                              | EU Clinical Coordinating center                                                            |
| Lauren                            | Demerville |                       |                  | APHP, DRCI                                                                   | France                                   | Legal                                                   | EU Clinical Coordinating center                                                            |
| Serge                             | Bureau     |                       |                  | APHP, DRCI                                                                   | France                                   | Researcher                                              | EU Clinical Coordinating center                                                            |
| Sarah                             | Preston    |                       |                  | Green Lane Coordinating Centre                                               | New Zealand                              | Researcher                                              | New Zealand Coordinating Center                                                            |
| Maria                             | Simula     |                       |                  | Green Lane Coordinating Centre                                               | New Zealand                              | Researcher                                              | New Zealand Coordinating Center                                                            |
| Derek                             | Chew       |                       |                  | Flinders University                                                          | Australia                                | Principal Investigator                                  | Australia Coordinating Center                                                              |
| Yogesh                            | Sharma     |                       |                  | Flinders University                                                          | Australia                                | Principal Investigator                                  | Australia Coordinating Center                                                              |
| Asha                              | Aravind    |                       |                  | Flinders University                                                          | Australia                                | Researcher                                              | Australia Coordinating Center                                                              |
| Christine                         | Hincks     |                       |                  | Flinders University                                                          | Australia                                | Researcher                                              | Australia Coordinating Center                                                              |
| Ivana                             | Hunt       |                       |                  | Flinders University                                                          | Australia                                | Coordinator                                             | Australia Coordinating Center                                                              |
| Simeoni                           | Thomas     |                       |                  | Flinders University                                                          | Australia                                | Researcher                                              | Australia Coordinating Center                                                              |



## Supplemental Online Content: Nonauthor Collaborators

\*Indicates required information. Only first name, last name, and suffix will appear in PubMed.

| *First Name and Middle Initial(s) | *Last Name | *Suffix (eg, Jr, III) | Academic Degrees | Institution                                     | Location (city, state/province, country) | Role or Contribution, eg, chair, principal investigator | Group (if more than 1 Group listed in the byline) and/or Subgroup (eg, Steering Committee) |
|-----------------------------------|------------|-----------------------|------------------|-------------------------------------------------|------------------------------------------|---------------------------------------------------------|--------------------------------------------------------------------------------------------|
| Fiona                             | Wollaston  |                       |                  | Flinders University                             | Australia                                | Researcher                                              | Australia Coordinating Center                                                              |
| Marnie                            | Bertolet   |                       |                  | University of Pittsburgh                        | United States                            | Co-Investigator                                         | Data Coordinating Center                                                                   |
| Brandon                           | Herbert    |                       |                  | University of Pittsburgh                        | United States                            | Data Analyst                                            | Data Coordinating Center                                                                   |
| Sheryl                            | Kelsey     |                       |                  | University of Pittsburgh                        | United States                            | Co-Investigator                                         | Data Coordinating Center                                                                   |
| Manuel                            | Lombardero |                       |                  | University of Pittsburgh                        | United States                            | Data Analyst                                            | Data Coordinating Center                                                                   |
| Rocco                             | Mercurio   |                       |                  | University of Pittsburgh                        | United States                            | Data Management                                         | Data Coordinating Center                                                                   |
| Gerard                            | Portela    |                       |                  | University of Pittsburgh                        | United States                            | Data Analyst                                            | Data Coordinating Center                                                                   |
| Jennifer                          | Stevenson  |                       |                  | University of Pittsburgh                        | United States                            | Coordinator                                             | Data Coordinating Center                                                                   |
| Donna                             | Stoliker   |                       |                  | University of Pittsburgh                        | United States                            | Data Management                                         | Data Coordinating Center                                                                   |
| Ella                              | Zadorozny  |                       |                  | University of Pittsburgh                        | United States                            | Data Management                                         | Data Coordinating Center                                                                   |
| Jane F.                           | Eckstein   |                       |                  | St Louis University                             | United States                            | Researcher                                              | Clinical Events Committee                                                                  |
| Simone                            | Glynn      |                       |                  | National Heart Lung and Blood Institute (NHLBI) | United States                            | NHLBI                                                   |                                                                                            |
| Eric                              | Leifer     |                       |                  | National Heart Lung and Blood Institute (NHLBI) | United States                            | NHLBI                                                   |                                                                                            |
| Erin                              | Smith      |                       |                  | National Heart Lung and Blood Institute (NHLBI) | United States                            | NHLBI                                                   |                                                                                            |
| George                            | Sopko      |                       |                  | National Heart Lung and Blood Institute (NHLBI) | United States                            | NHLBI                                                   |                                                                                            |

## Supplemental Online Content: Nonauthor Collaborators

\*Indicates required information. Only first name, last name, and suffix will appear in PubMed.

| *First Name and Middle Initial(s) | *Last Name | *Suffix (eg, Jr, III) | Academic Degrees | Institution                                     | Location (city, state/province, country) | Role or Contribution, eg, chair, principal investigator | Group (if more than 1 Group listed in the byline) and/or Subgroup (eg, Steering Committee) |
|-----------------------------------|------------|-----------------------|------------------|-------------------------------------------------|------------------------------------------|---------------------------------------------------------|--------------------------------------------------------------------------------------------|
| Phil                              | Tonkins    |                       |                  | National Heart Lung and Blood Institute (NHLBI) | United States                            | NHLBI                                                   |                                                                                            |
| Pablo                             | Cure       |                       |                  | National Heart Lung and Blood Institute (NHLBI) | United States                            | NHLBI                                                   |                                                                                            |
| Catherine                         | Levy       |                       |                  | National Heart Lung and Blood Institute (NHLBI) | United States                            | NHLBI                                                   |                                                                                            |
| Naomi                             | Luban      |                       |                  | Data and Safety Monitoring Board (DSMB)         | United States                            | DSMB Chair                                              |                                                                                            |
| Barbara                           | Konkle     |                       |                  | Data and Safety Monitoring Board (DSMB)         | United States                            | DSMB Vice Chair                                         |                                                                                            |
| Deepak                            | Bhatt      |                       |                  | Data and Safety Monitoring Board (DSMB)         | United States                            | DSMB Member                                             |                                                                                            |
| Eldad                             | Hod        |                       |                  | Data and Safety Monitoring Board (DSMB)         | United States                            | DSMB Member                                             |                                                                                            |
| Cassandra                         | Josephson  |                       |                  | Data and Safety Monitoring Board (DSMB)         | United States                            | DSMB Member                                             |                                                                                            |
| KyungMann                         | Kim        |                       |                  | Data and Safety Monitoring Board (DSMB)         | United States                            | DSMB Member                                             |                                                                                            |
| Agnes                             | Lee        |                       |                  | Data and Safety Monitoring Board (DSMB)         | United States                            | DSMB Member                                             |                                                                                            |
| Leslie                            | Serchuck   |                       |                  | Data and Safety Monitoring Board (DSMB)         | United States                            | DSMB Member                                             |                                                                                            |
| Peter                             | Stone      |                       |                  | Data and Safety Monitoring Board (DSMB)         | United States                            | DSMB Member                                             |                                                                                            |
| Darby                             | Thompson   |                       |                  | Data and Safety Monitoring Board (DSMB)         | United States                            | DSMB Member                                             |                                                                                            |
| Kathryn                           | Weise      |                       |                  | Data and Safety Monitoring Board (DSMB)         | United States                            | DSMB Member                                             |                                                                                            |
