# Supplementary material for: Anemia Acuity Effect on Transfusion Strategies in Acute Myocardial Infarction: A Secondary Analysis of the MINT Trial
Source: PubMed Central journal article supplement (PMC11530937; doi:10.1001/jamanetworkopen.2024.42361), 2024-11-01
Supplement: jamanetwopen-e2442361-s004.pdf [file jamanetwopen-e2442361-s004.pdf]

## Data Sharing Statement

Carrier. Anemia Acuity Effect on Transfusion Strategies in Acute Myocardial Infarction. *JAMA Netw Open*. Published November 01, 2024. doi:10.1001/jamanetworkopen.2024.42361

### Data

**Additional Information:** NCT02981407 (ClinicalTrials.gov)

**Data available:** Yes

**Data types:** Deidentified participant data

**How to access data:** NIH Data Repository

**When available:** beginning date: 11-11-2025

### Supporting Documents

**Document types:** Statistical/analytic code

**How to access documents:** Submitted with their manuscript

**When available:** With publication

### Additional Information

**Who can access the data:** anyone requesting the data

**Types of analyses:** for any purpose

**Mechanisms of data availability:** Through NIH repository
